# Supplementary material
Source: PubMed Central journal article supplement (PMC4653814)

# NAT1 Continental Groups

## Africa

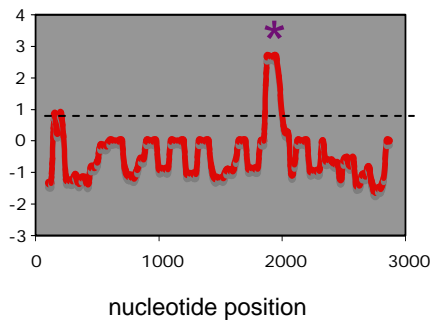

## East Africa

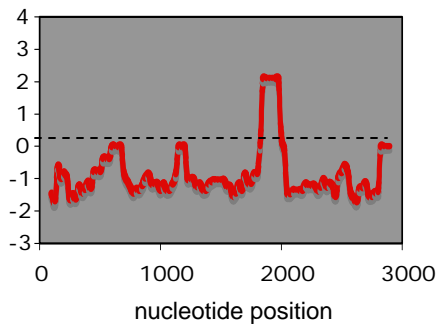

## West Africa

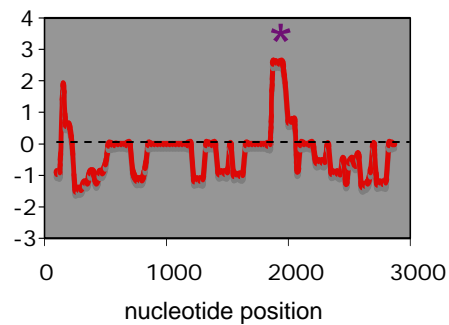

## Europe

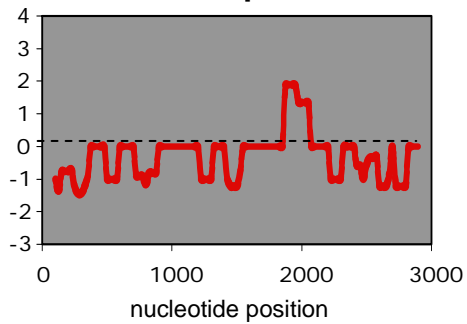

## Asia

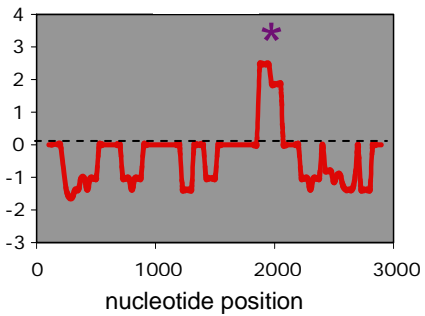

## America

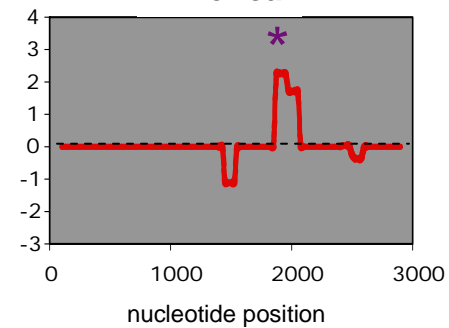

# NAT1 Africa

**BG**

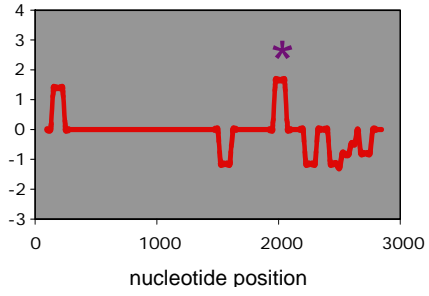

**BK**

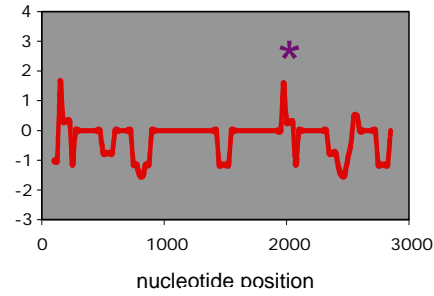

**DN**

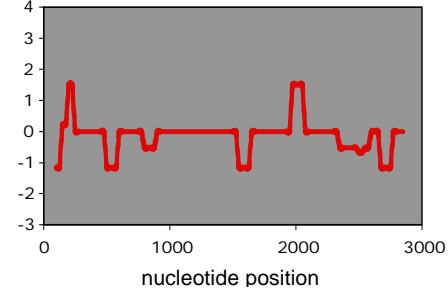

**FU**

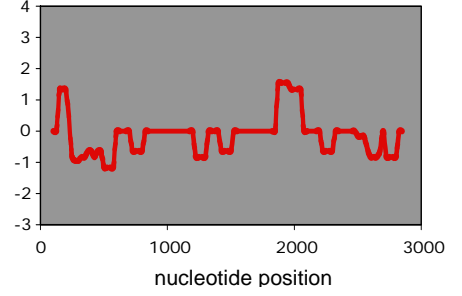

**HZ**

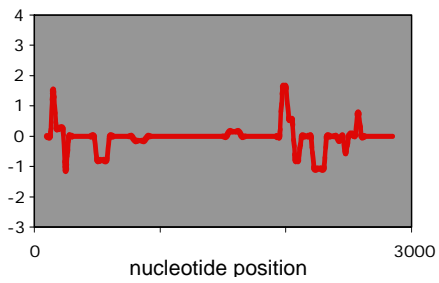

**KN**

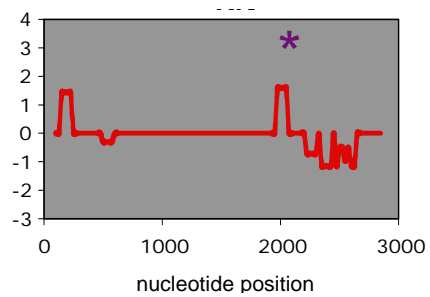

**LM**

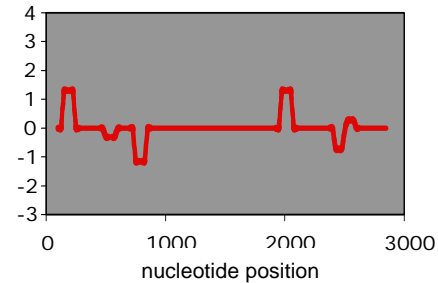

**MD**

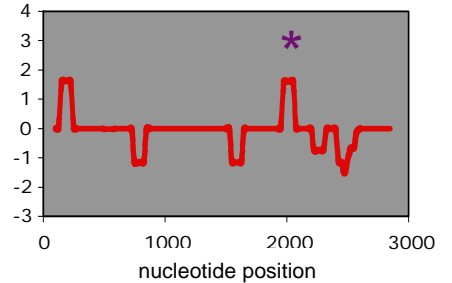

**MS**

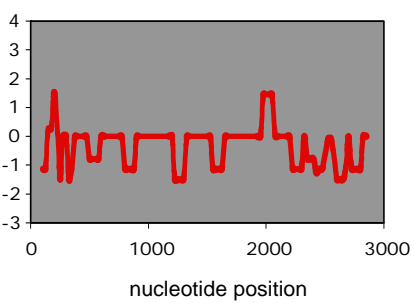

**PB**

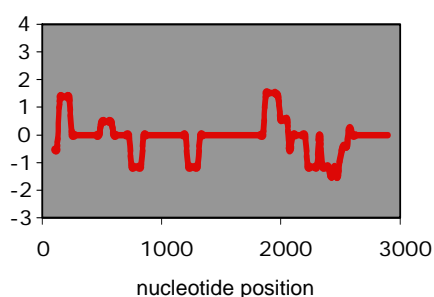

**PL**

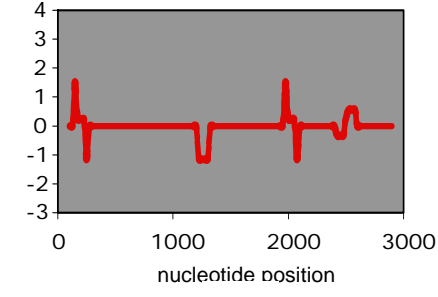

**SA**

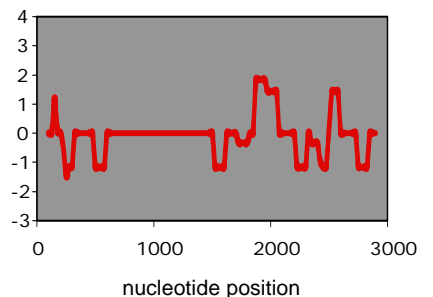

**SW**

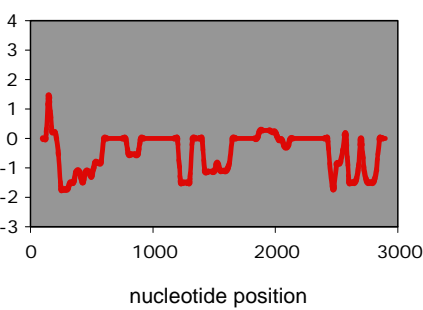

**TR**

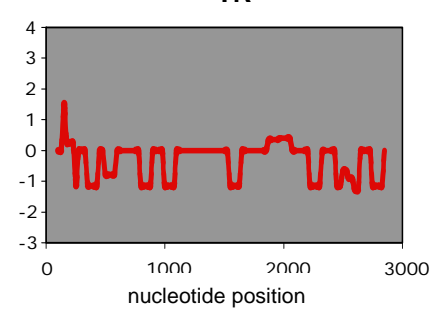

**YO**

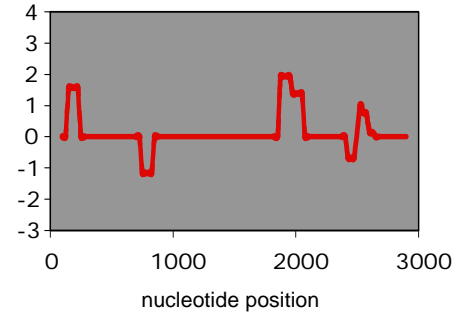

# NAT1 Europe

## DZ

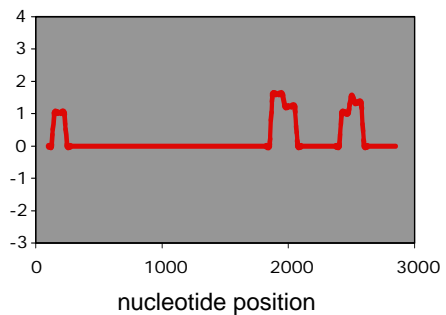

## FR

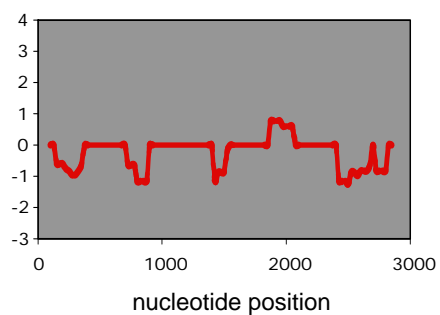

## PA

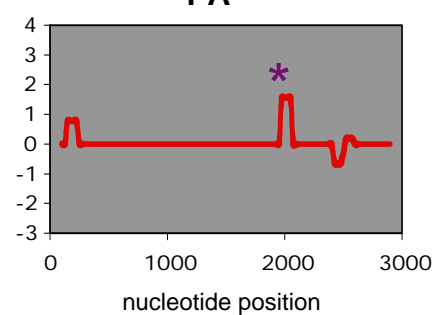

## SR

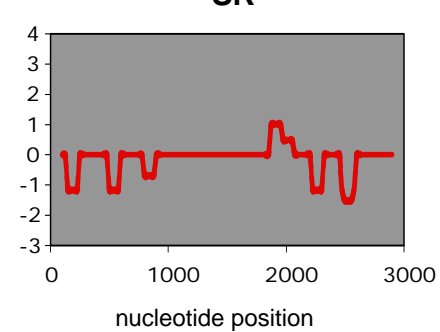

## RU

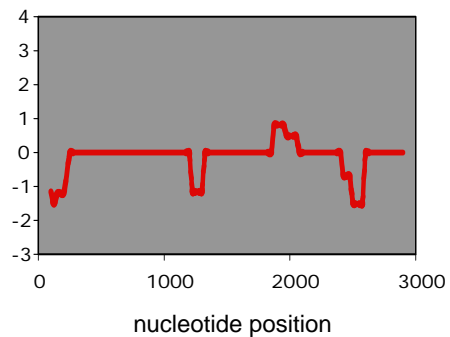

## NAT1 Asia

**CB**

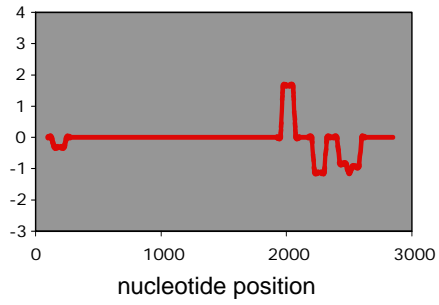

**JP**

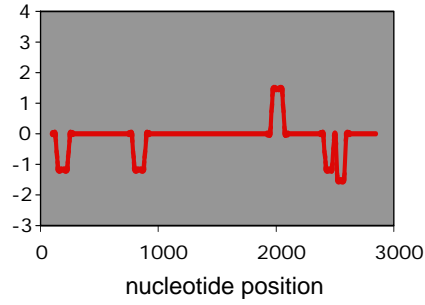

**SB**

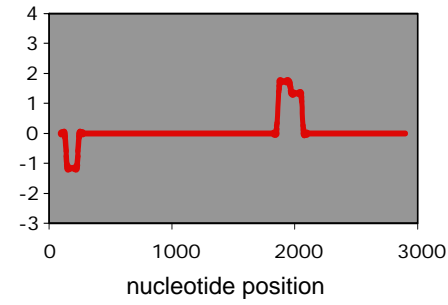

**NG**

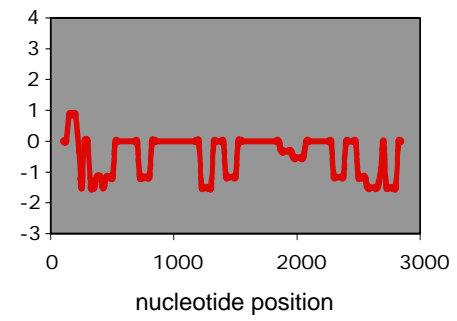

## NAT1 America

**BR**

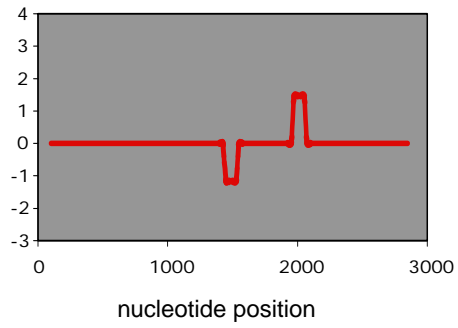

**PI**

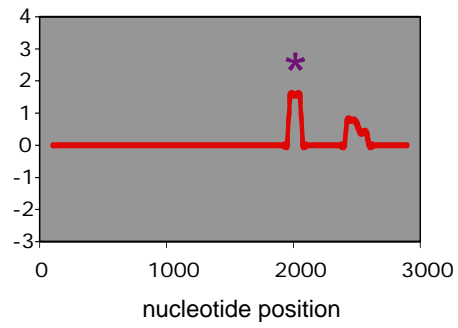

Supplement: NIHMS517703-supplement-Supplementary_2.pdf [file NIHMS517703-supplement-Supplementary_2.pdf]
