# Supplementary material
Source: PubMed Central journal article supplement (PMC4653814)

# NAT1 East Africa

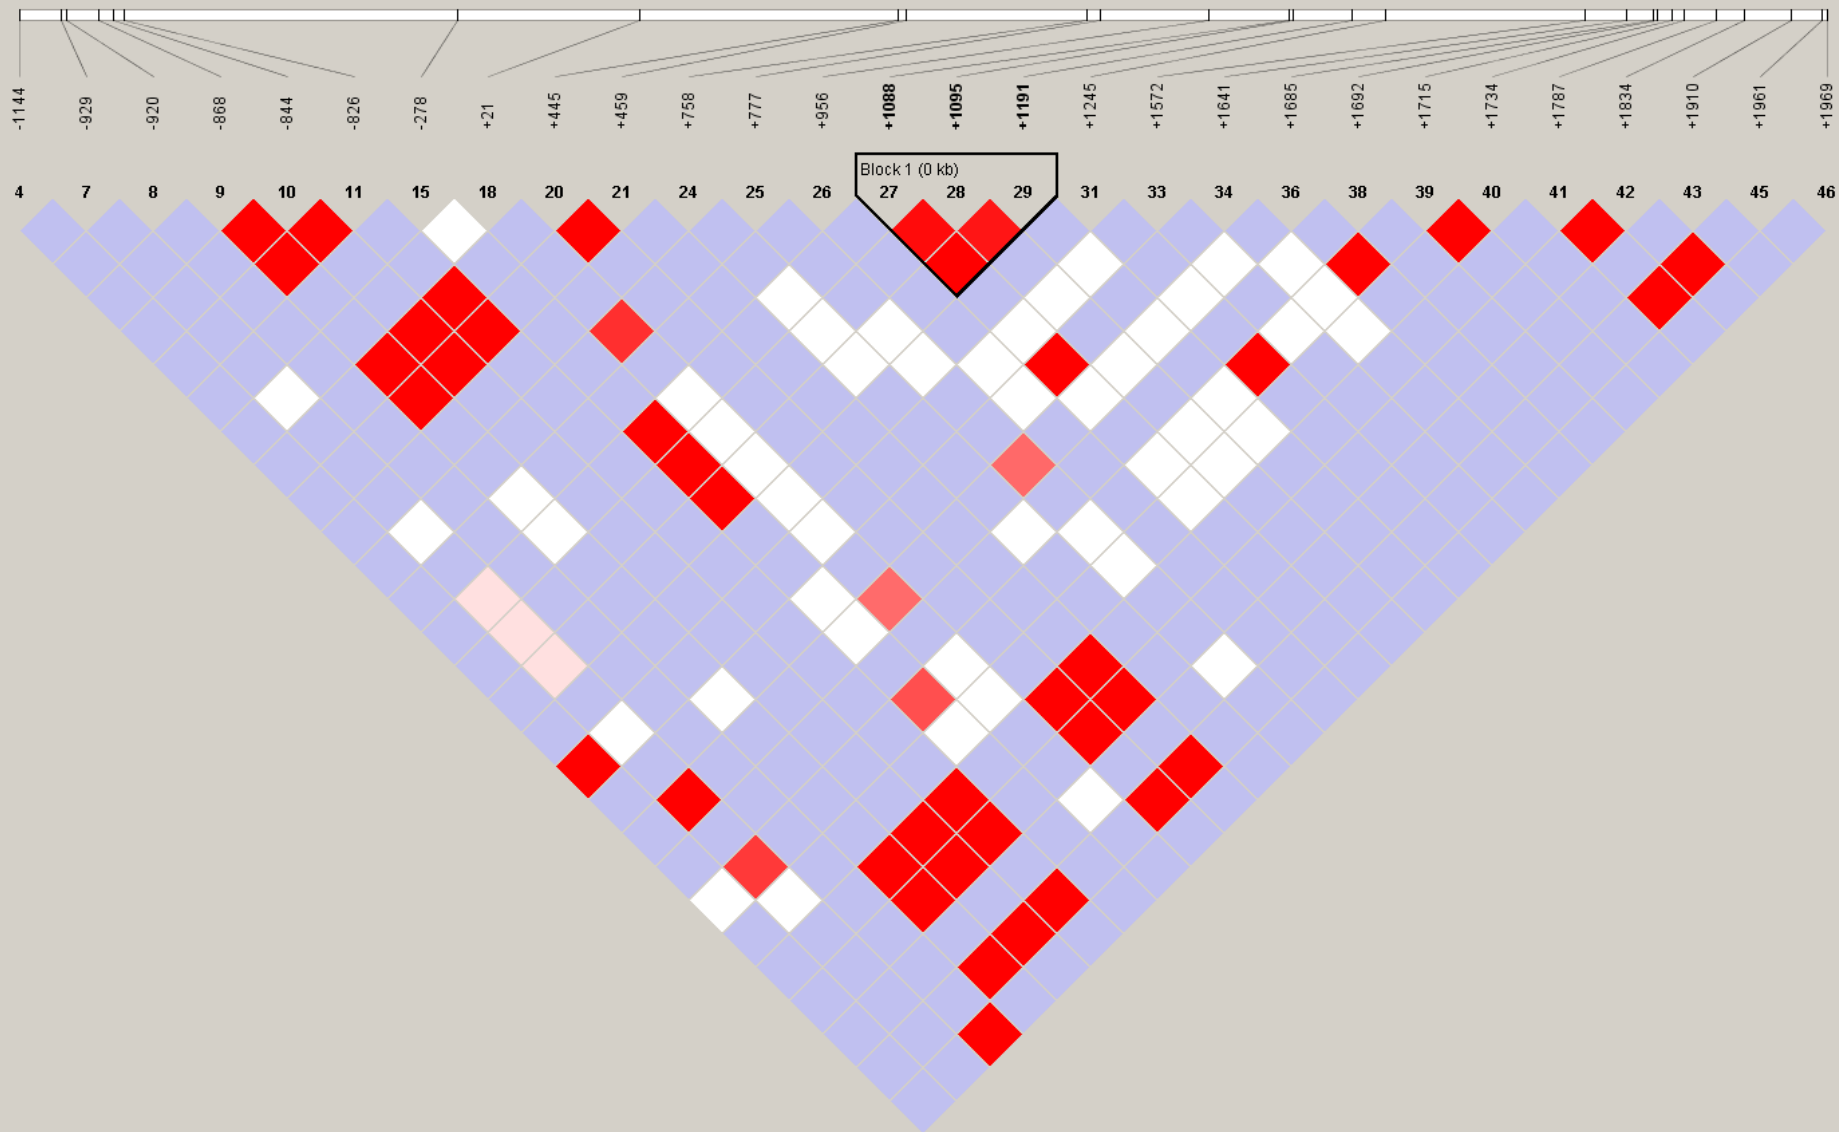

# NAT1 West Africa

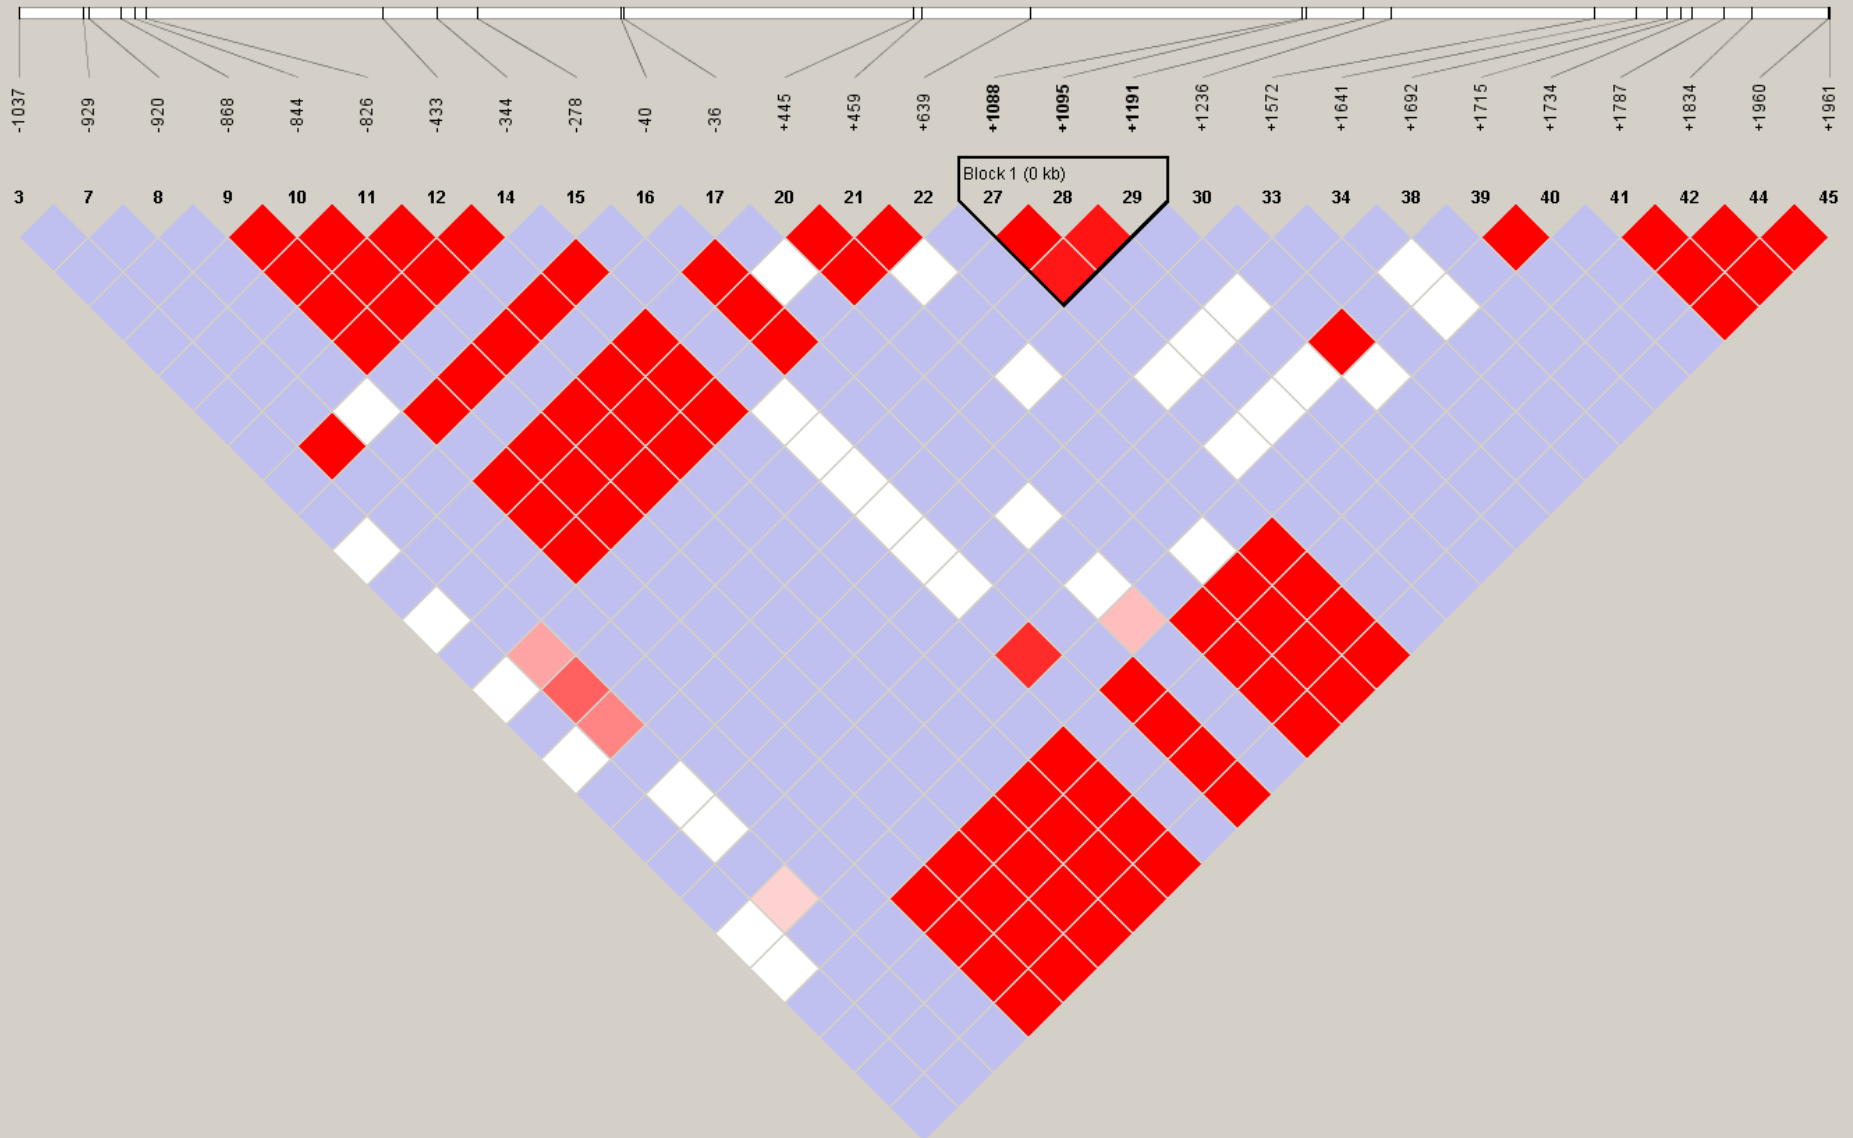

# NAT1 Asia

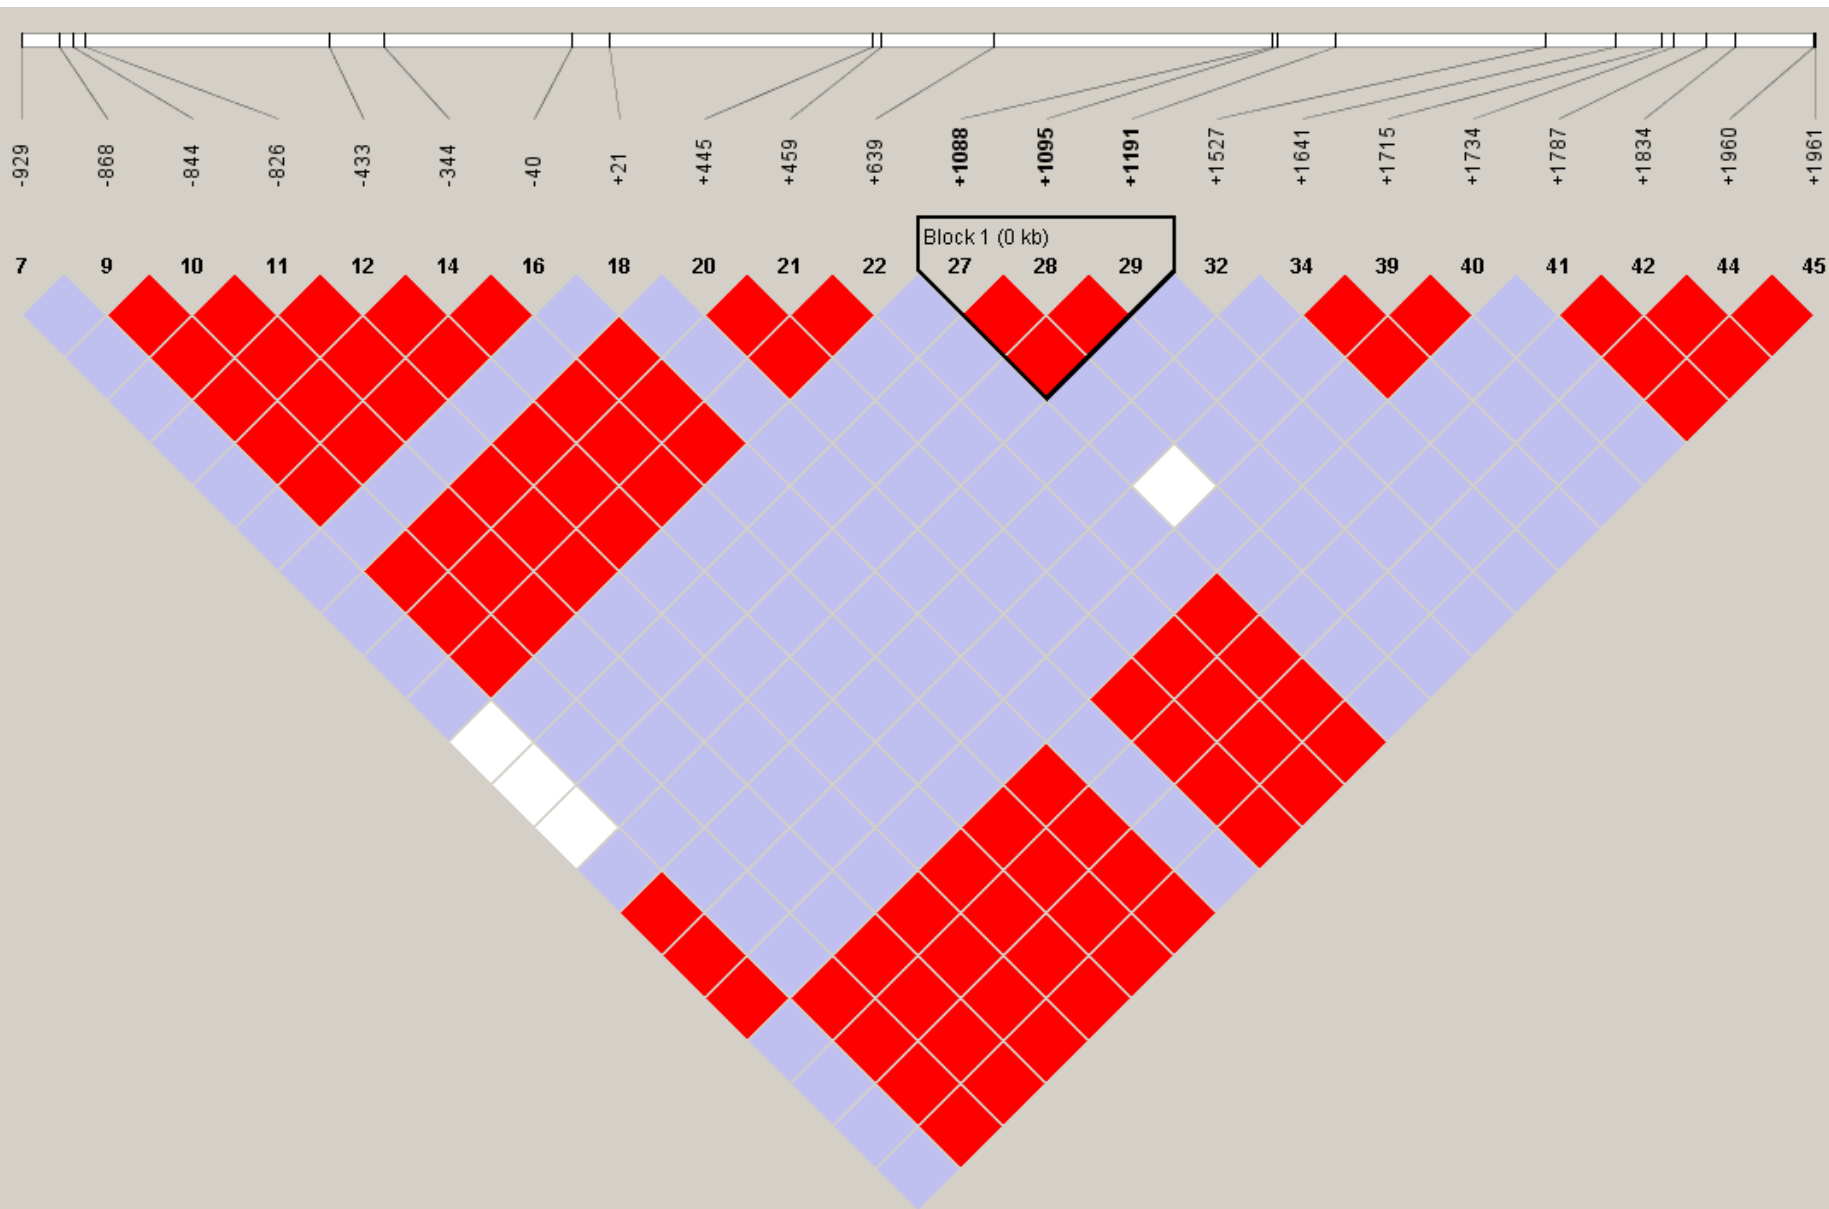

# NAT1 Europe

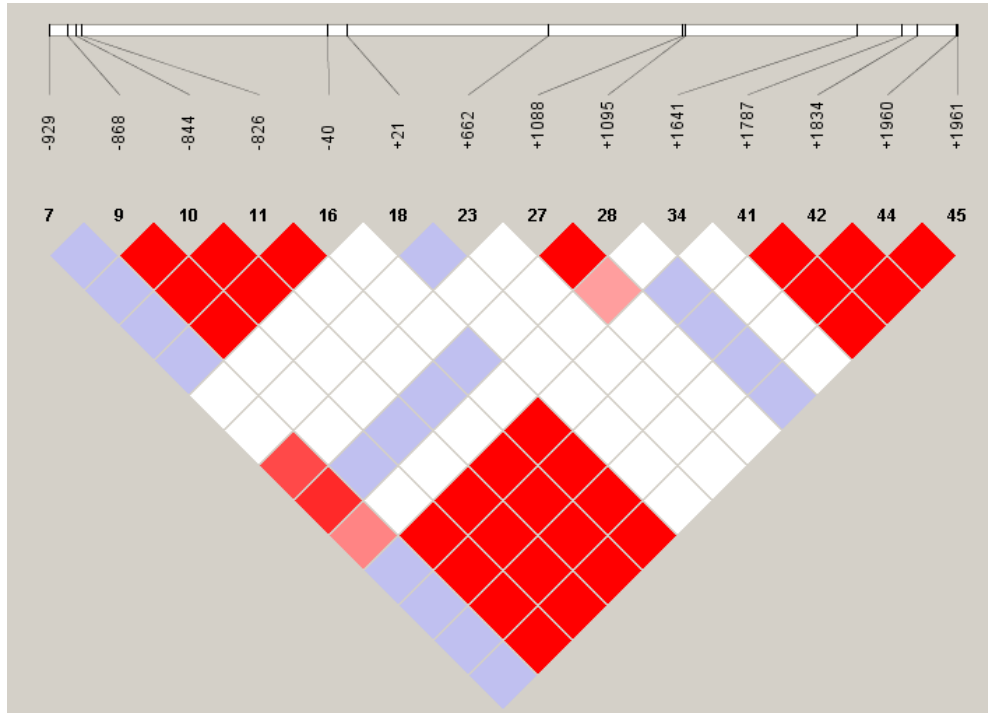

# NAT1 Americas

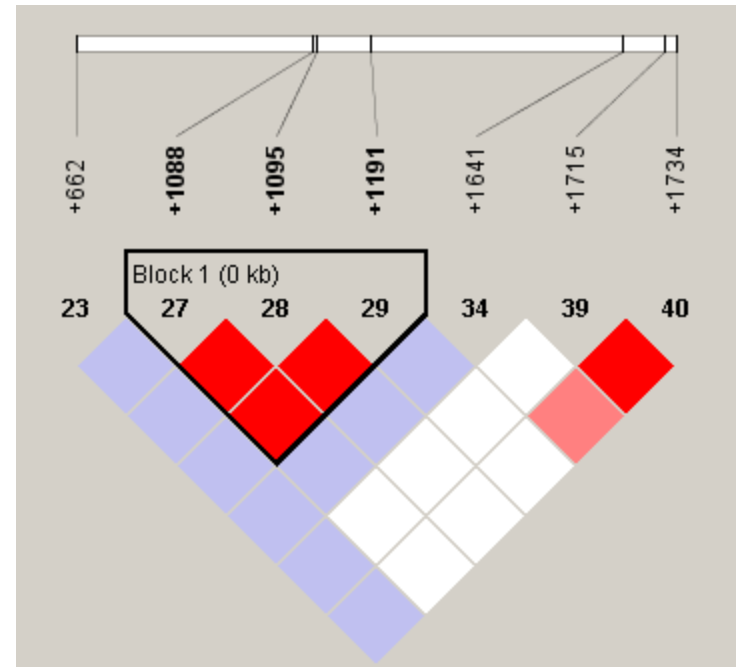

# NAT2 East Africa

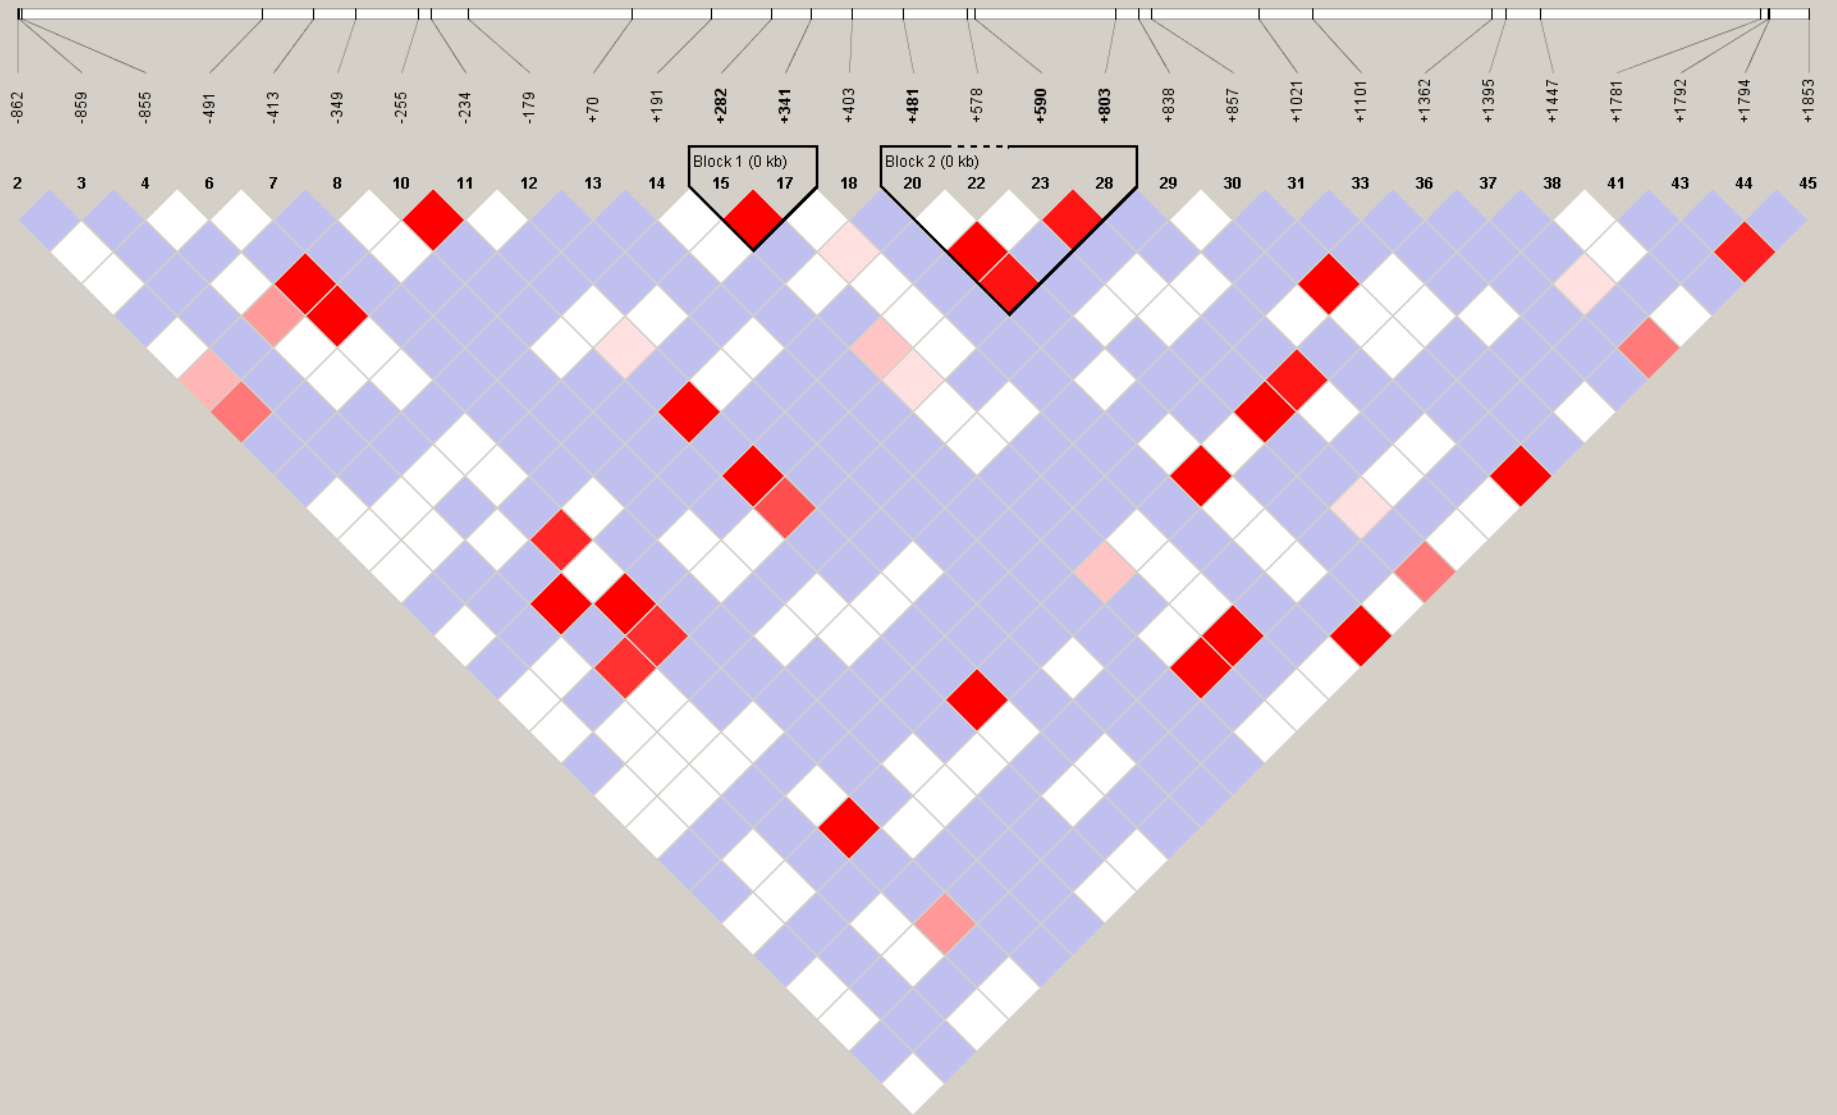



# NAT2 Asia

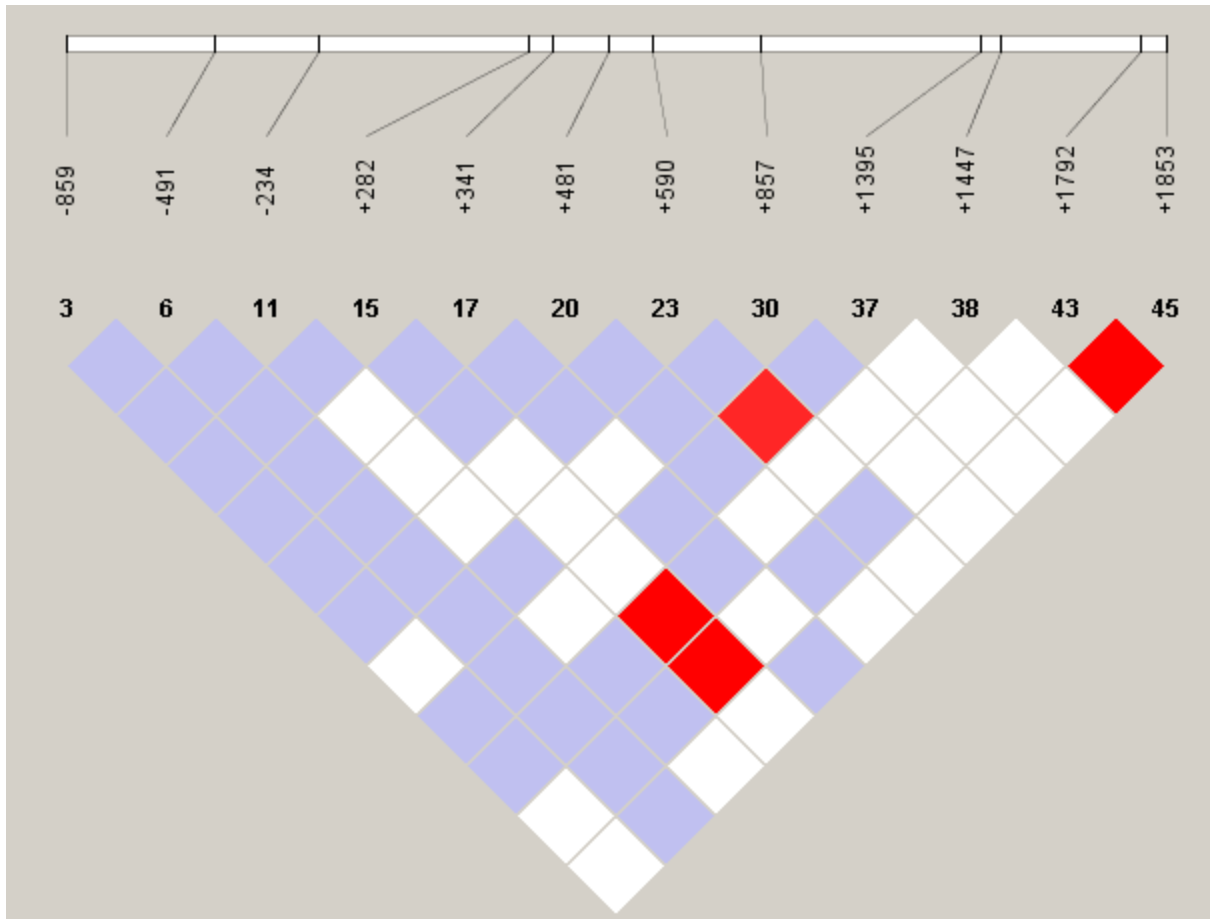

# NAT2 Europe

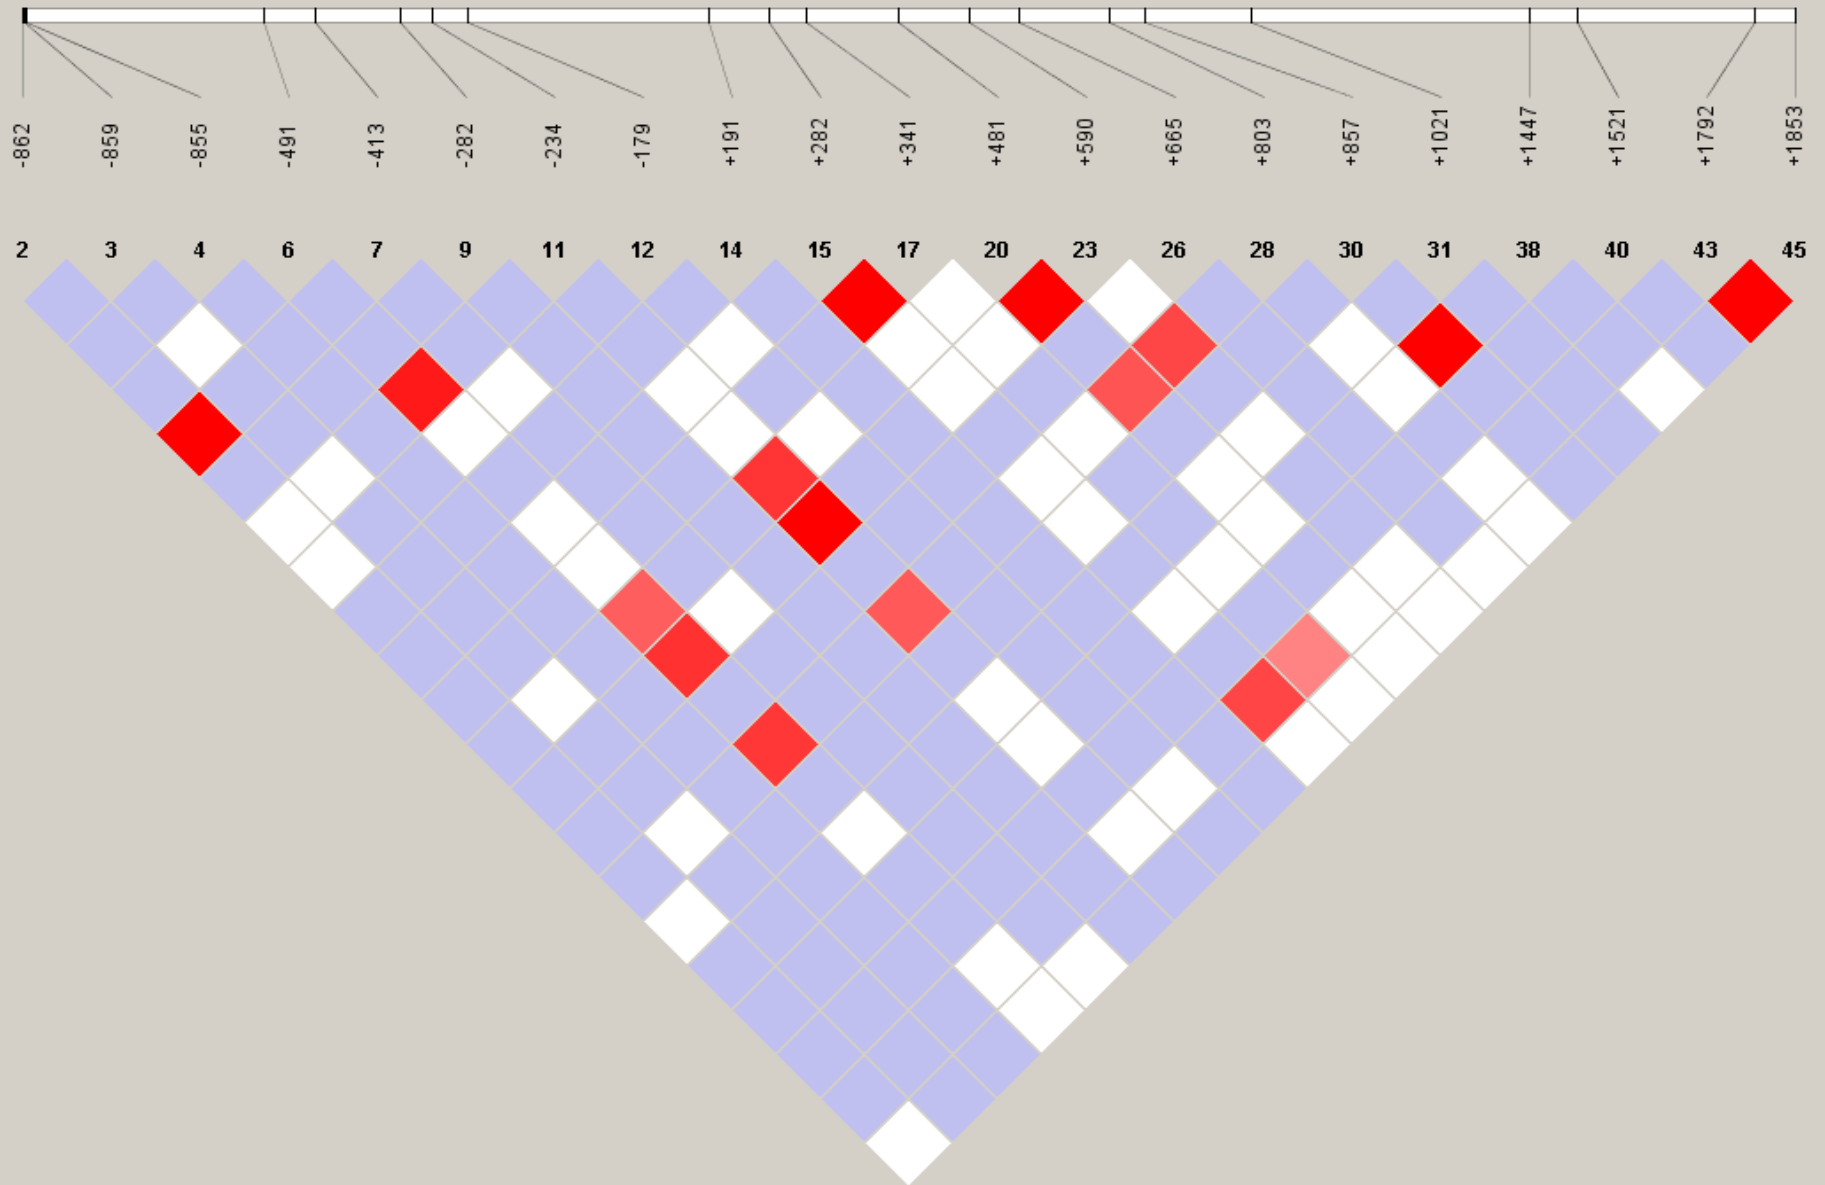



# NAT2 Americas

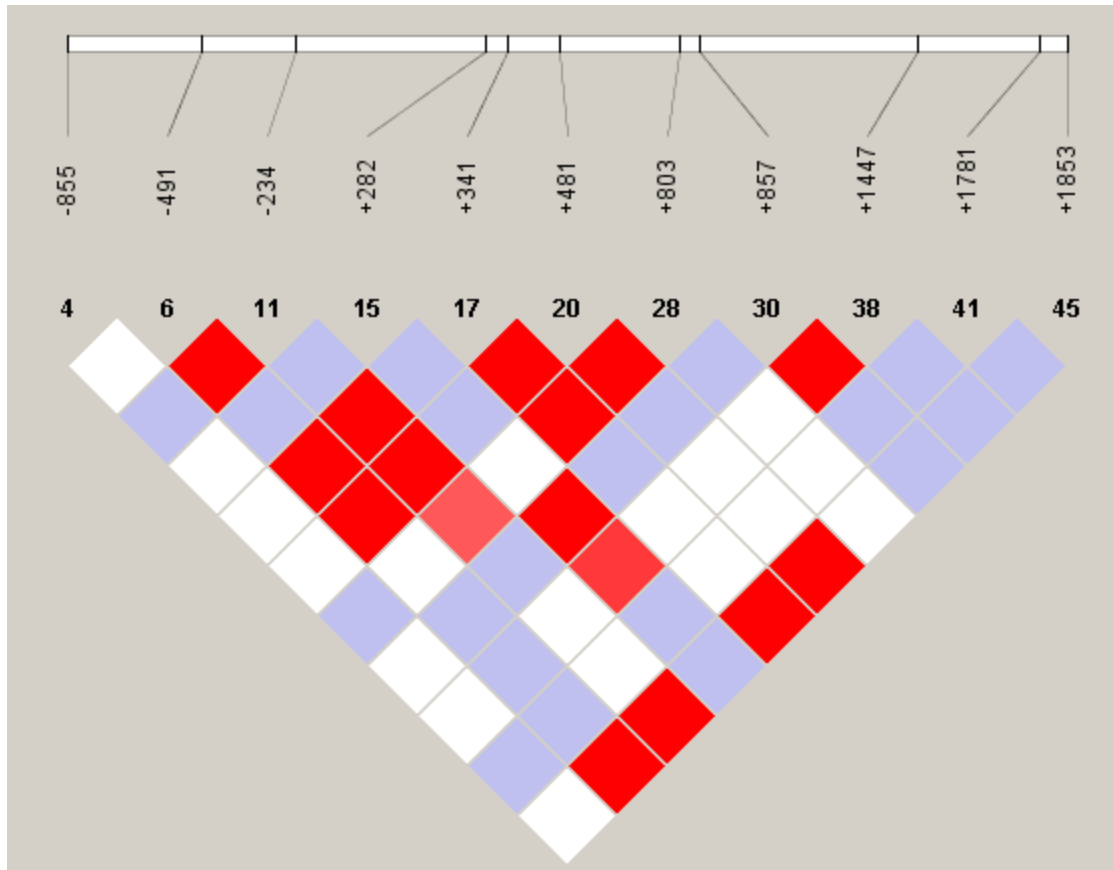

Supplement: NIHMS517703-supplement-Supplementary_3.pdf [file NIHMS517703-supplement-Supplementary_3.pdf]
