# Supplementary material
Source: PubMed Central journal article supplement (PMC4653814)
Supplement: NIHMS517703-supplement-Supplementary_7.pdf [file NIHMS517703-supplement-Supplementary_7.pdf]

| <b>NAT PCR and Sequencing Primers</b>                                                                                                                                                                                                  |                        |                            |
|----------------------------------------------------------------------------------------------------------------------------------------------------------------------------------------------------------------------------------------|------------------------|----------------------------|
| <b>NAT1</b>                                                                                                                                                                                                                            |                        |                            |
| <b>2856 bp</b>                                                                                                                                                                                                                         | <b>Oligonucleotide</b> | <b>5'-3' Sequence</b>      |
|                                                                                                                                                                                                                                        | -1182_F                | GCCAAGCACTGGTCCTAGAG       |
|                                                                                                                                                                                                                                        | -455_R                 | CAAAGTTTCCCCTCAAAGA        |
|                                                                                                                                                                                                                                        | -574F                  | AAGCACTAGAACAGTAGGAA       |
|                                                                                                                                                                                                                                        | -194_R                 | CCCAGAATCCTGTGAGAAATG      |
|                                                                                                                                                                                                                                        | -78_F                  | GCCATAATTAGCCTACTCAA       |
|                                                                                                                                                                                                                                        | +301_R                 | GTGAATCATGCCAGTGCTGT       |
|                                                                                                                                                                                                                                        | +473_F                 | CTGGTATCTAGACCAAATC        |
|                                                                                                                                                                                                                                        | +933_F                 | CCTATCATGTATCTTCTGTAC      |
|                                                                                                                                                                                                                                        | +1387_F                | TGCCATACAAGAATGAACATGA     |
|                                                                                                                                                                                                                                        | +1420_R                | GGATTTCAACTCAGATCTAC       |
|                                                                                                                                                                                                                                        | +2066_R                | AGCTGGAAAAGGCCAGTACA       |
| <b>NAT2</b>                                                                                                                                                                                                                            |                        |                            |
| <b>3064 bp</b>                                                                                                                                                                                                                         | <b>Oligonucleotide</b> | <b>5'-3' Sequence</b>      |
|                                                                                                                                                                                                                                        | -1134_F                | TCCTACATAGTTTATGTGAC       |
|                                                                                                                                                                                                                                        | -545_F                 | ACACATCAAGAGTATTCTGT       |
|                                                                                                                                                                                                                                        | -443_R                 | GACCCACTTGATTTCCCATTT      |
|                                                                                                                                                                                                                                        | -77_R                  | GGATCTGGTGCTCAAGAATG       |
|                                                                                                                                                                                                                                        | -15_F                  | CTTGCTTAGGGGATCATGGACA     |
|                                                                                                                                                                                                                                        | +702_F                 | GTGGGCTTCATCCTCACCTAT      |
|                                                                                                                                                                                                                                        | +779_R                 | CAGCACTTCTTCAACCTCTTCC     |
|                                                                                                                                                                                                                                        | +1320_F                | AATAGAGTCTTCTCTCATC        |
|                                                                                                                                                                                                                                        | +1373_R                | TGTGGCAAAGTATGGATGGA       |
|                                                                                                                                                                                                                                        | +1812_F                | ACTGCAGATTTGTTCTTAAC       |
|                                                                                                                                                                                                                                        | +2412_R                | ATTCGCTTCCAGGTTGAAG        |
| <b>NATP1</b>                                                                                                                                                                                                                           |                        |                            |
| <b>3000 bp</b>                                                                                                                                                                                                                         | <b>Oligonucleotide</b> | <b>5'-3' Sequence</b>      |
|                                                                                                                                                                                                                                        | -1204_F                | GGCATTACTGCCTAGAGCATTTT    |
|                                                                                                                                                                                                                                        | -1160_F                | TCAAACCTACCAATGACATTCTGC   |
|                                                                                                                                                                                                                                        | -577_R                 | GCAGATAACCTACAGAGTGGGA     |
|                                                                                                                                                                                                                                        | -631_F                 | TGGGACTCAAACCTAAAGTGCTTGTA |
|                                                                                                                                                                                                                                        | -60_F                  | CAAGGGAATCTAAGGGCAAAAAG    |
|                                                                                                                                                                                                                                        | -14_R                  | TTGTTTAAGGGATCATGG         |
|                                                                                                                                                                                                                                        | +535_F                 | TGATCTCCGGAAGAAAAGAAA      |
|                                                                                                                                                                                                                                        | +555_R                 | CCTTACTCCTGAATCCTGAACA     |
|                                                                                                                                                                                                                                        | +1080_F                | CCTGTGATTATCTTGGGAACCAT    |
|                                                                                                                                                                                                                                        | +1112_R                | TGTGAGAAAATATTTAATGCGGG    |
|                                                                                                                                                                                                                                        | +1500_F                | CAGTGCCAGACCTGGAGTAAA      |
|                                                                                                                                                                                                                                        | +1655_R                | ATCTGCCTGCTTCTTCTTG        |
|                                                                                                                                                                                                                                        | +1860_R                | CCTGTGATTATCTTGGGAACCAT    |
| <p>*All primer numbering is with respect to the +1=ATG .<br/> <i>NATP1</i> ATG start was inferred according to consensus alignment with <i>NAT1</i> and <i>NAT2</i><br/> F and R denote Forward and Reverse Primers, respectively.</p> |                        |                            |
