# Supplementary material
Source: PubMed Central journal article supplement (PMC4653814)
Supplement: NIHMS517703-supplement-Supplementary_8.pdf [file NIHMS517703-supplement-Supplementary_8.pdf]

|                                                      | N         | 2N     | S         | s     | r         | H      | HD    | Si      | $\pi(=10^3)$ | $\theta_0(=10^3)$ | TD       | P(TD<obs) | D*       | P(D*<obs) | F*       | P(F*<obs) | D        | P(D<obs) | F        | P(F<obs) | H         | P(H<obs)  |
|------------------------------------------------------|-----------|--------|-----------|-------|-----------|--------|-------|---------|--------------|-------------------|----------|-----------|----------|-----------|----------|-----------|----------|----------|----------|----------|-----------|-----------|
| <b>NATI</b>                                          |           |        |           |       |           |        |       |         |              |                   |          |           |          |           |          |           |          |          |          |          |           |           |
| Africa                                               | 194       | 388    | 43        | 6     | 2         | 72     | 0.868 | 4       | 1.220        | 0.002             | -1.41735 | 0.0394*   | 0.35031  | 0.6557    | -0.54941 | 0.317     | 0.30558  | 0.646    | -0.67690 | 0.272    | -15.33997 | 0.007**   |
| E Africa                                             | 93        | 186    | 36        | 5     | 2         | 47     | 0.881 | 11      | 1.200        | 0.002             | -1.44153 | 0.041*    | -1.35749 | 0.085     | -1.67604 | 0.0576*   | -0.83531 | 0.2164   | -1.40566 | 0.100    | -13.76484 | 0.008**   |
| W Africa                                             | 79        | 158    | 31        | 2     | 2         | 38     | 0.857 | 3       | 1.210        | 0.002             | -1.07911 | 0.133     | 0.92079  | 0.801     | 0.12378  | 0.5934    | 0.90291  | 0.7875   | -0.01065 | 0.53310  | -15.07151 | 0.004**   |
| Pygmy groups                                         | 31        | 62     | 21        | 3     | 0         | 24     | 0.893 | 7       | 1.280        | 0.002             | -0.5624  | 0.339     | -0.93306 | 0.138     | -0.95246 | 0.1861    | -0.74290 | 0.2144   | -0.91957 | 0.2068   | -3.10100  | 0.1093    |
| Europe                                               | 59        | 118    | 26        | 3     | 1         | 21     | 0.612 | 9       | 0.950        | 0.002             | -1.30037 | 0.073     | -1.57412 | 0.056*    | -1.75807 | 0.0552*   | -0.96702 | 0.1668   | -1.41564 | 0.1013   | -11.11285 | 0.0083**  |
| Asia                                                 | 51        | 102    | 23        | 2     | 2         | 11     | 0.65  | 15      | 0.780        | 0.001             | -1.37411 | 0.062     | -4.98532 | 0.0007**  | -4.29272 | 0.0007*** | -1.94898 | 0.0609   | -2.17613 | 0.02910  | -15.05727 | 0.0005*** |
| Americas                                             | 23        | 46     | 7         | 1     | 0         | 7      | 0.675 | 1       | 0.760        | 0.001             | 0.96846  | 0.862     | 0.48112  | 0.8158    | 0.74551  | 0.7696    | 0.32361  | 0.5108   | 0.46854  | 0.6687   | -0.95459  | 0.1461    |
| <b>Africa</b>                                        |           |        |           |       |           |        |       |         |              |                   |          |           |          |           |          |           |          |          |          |          |           |           |
| Baka Pygmy                                           | 9         | 18     | 15        | 1     | 0         | 12     | 0.948 | 7       | 1.250        | 0.002             | -0.2855  | 0.4302    | -0.78067 | 0.177     | -0.73978 | 0.2424    | -0.38290 | 0.3524   | -0.49437 | 0.3496   | -2.16993  | 0.255     |
| Bakola Pygmy                                         | 7         | 14     | 10        | 1     | 0         | 10     | 0.956 | 3       | 1.250        | 0.001             | 0.54222  | 0.7519    | 0.16224  | 0.6371    | 0.30185  | 0.608     | -0.09199 | 0.4442   | 0.02549  | 0.5079   | 0.57143   | 0.3794    |
| Biaka Pygmy                                          | 15        | 30     | 17        | 2     | 0         | 13     | 0.795 | 9       | 1.190        | 0.002             | -0.70869 | 0.2644    | -1.62499 | 0.0903    | -1.56811 | 0.0809    | -2.10313 | 0.0328*  | -2.06871 | 0.0457   | -2.05057  | 0.2591    |
| Burunge                                              | 17        | 34     | 10        | 1     | 0         | 12     | 0.866 | 3       | 0.900        | 0.001             | 0.16842  | 0.633     | -0.26765 | 0.2755    | -0.15375 | 0.4357    | 0.13128  | 0.4869   | 0.03760  | 0.5334   | -3.00891  | 0.1965    |
| Dinka                                                | 9         | 18     | 12        | 2     | 0         | 8      | 0.804 | 4       | 1.180        | 0.001             | -0.12308 | 0.5007    | -0.12092 | 0.3525    | -0.14046 | 0.4383    | -0.39669 | 0.3368   | -0.47701 | 0.3566   | -2.06536  | 0.2337    |
| Fulani                                               | 11        | 22     | 20        | 1     | 2         | 8      | 0.732 | 1       | 1.630        | 0.002             | -0.56415 | 0.3196    | 1.31555  | 0.9855    | 0.8765   | 0.8448    | 1.44166  | 0.948    | 0.90518  | 0.8228   | -11.42857 | 0.1162    |
| Hadzabe                                              | 16        | 32     | 15        | 2     | 0         | 20     | 0.956 | 3       | 1.490        | 0.001             | 0.24574  | 0.6572    | 0.421    | 0.7126    | 0.42921  | 0.6728    | 0.32719  | 0.715    | 0.28137  | 0.6233   | -0.52016  | 0.2998    |
| Kanuri                                               | 13        | 26     | 10        | 0     | 0         | 9      | 0.791 | 3       | 1.030        | 0.001             | 0.40851  | 0.7178    | -0.14176 | 0.3191    | 0.02762  | 0.4965    | 0.22209  | 0.5206   | 0.22368  | 0.58930  | -4.00000  | 0.16470   |
| Lemande                                              | 13        | 26     | 9         | 0     | 0         | 10     | 0.806 | 1       | 1.030        | 0.001             | 0.78181  | 0.8216    | 0.81213  | 0.7118    | 0.93585  | 0.8394    | 0.73587  | 0.6913   | 0.80718  | 0.785    | -0.51692  | 0.2910    |
| Maasai                                               | 16        | 32     | 21        | 3     | 1         | 17     | 0.933 | 13      | 1.060        | 0.002             | -1.11609 | 0.1286    | -2.33563 | 0.0366*   | -2.28657 | 0.0318*   | -1.46880 | 0.0917   | -1.72305 | 0.0809   | -8.91935  | 0.16170   |
| Mada                                                 | 14        | 28     | 12        | 1     | 0         | 12     | 0.873 | 4       | 1.130        | 0.001             | 0.15733  | 0.6221    | -0.36821 | 0.2612    | -0.24191 | 0.4089    | -0.64204 | 0.2493   | -0.57181 | 0.32410  | -1.83069  | 0.23960   |
| S African San                                        | 7         | 14     | 14        | 1     | 0         | 10     | 0.945 | 7       | 1.450        | 0.002             | -0.24881 | 0.4417    | -0.7116  | 0.1944    | -0.6722  | 0.261     | -0.78110 | 0.2478   | -0.83460 | 0.26470  | -2.63736  | 0.2178    |
| Sandawe                                              | 19        | 38     | 26        | 4     | 2         | 16     | 0.815 | 16      | 1.140        | 0.002             | -1.62799 | 0.0311*   | -2.63662 | 0.0204*   | -2.71819 | 0.0185*   | -1.62062 | 0.0775   | -1.98874 | 0.0497*  | -10.78236 | 0.15370   |
| Turu                                                 | 16        | 32     | 15        | 3     | 0         | 12     | 0.714 | 9       | 0.870        | 0.001             | -1.26692 | 0.095     | -1.87308 | 0.0518*   | -1.97461 | 0.0443*   | -1.93044 | 0.029*   | -2.09171 | 0.041*   | -4.30242  | 0.19150   |
| Yoruba                                               | 12        | 24     | 8         | 0     | 0         | 12     | 0.906 | 1       | 1.040        | 0.001             | 1.25195  | 0.9153    | 0.73702  | 0.8968    | 1.03237  | 0.8642    | 0.63214  | 0.6576   | 0.87531  | 0.79850  | 0.31159   | 0.34850   |
| <b>Europe</b>                                        |           |        |           |       |           |        |       |         |              |                   |          |           |          |           |          |           |          |          |          |          |           |           |
| French                                               | 11        | 22     | 19        | 2     | 1         | 9      | 0.701 | 5       | 1.310        | 0.002             | -1.03829 | 0.1611    | 0.13329  | 0.6014    | -0.25362 | 0.3937    | 0.33499  | 0.5965   | -0.18080 | 0.4592   | -8.00000  | 0.15150   |
| Druze                                                | 12        | 24     | 7         | 0     | 0         | 3      | 0.489 | 0       | 1.090        | 0.001             | 2.0699   | 0.9826    | 1.2873   | 0.861     | 1.75988  | 0.9855    | 1.28513  | 0.8598   | 1.76479  | 0.9779   | -0.78261  | 0.26650   |
| Sardinian                                            | 12        | 24     | 9         | 1     | 0         | 5      | 0.486 | 5       | 0.600        | 0.001             | -0.96176 | 0.1842    | -1.35698 | 0.1516    | -1.4428  | 0.1125    | -0.56674 | 0.2676   | -0.92260 | 0.22210  | -5.02899  | 0.1294    |
| Brahui                                               | 12        | 24     | 8         | 0     | 0         | 8      | 0.797 | 1       | 1.010        | 0.001             | 1.12172  | 0.891     | 0.73702  | 0.8885    | 0.00075  | 0.4857    | 0.63214  | 0.6501   | 0.82970  | 0.79310  | -0.44928  | 0.2999    |
| Russian                                              | 12        | 24     | 10        | 1     | 0         | 6      | 0.496 | 5       | 0.640        | 0.001             | -1.0748  | 0.142     | -1.11112 | 0.1055    | -1.28093 | 0.1238    | -0.96891 | 0.1724   | -1.27122 | 0.16020  | -2.97101  | 0.2999    |
| <b>Asia</b>                                          |           |        |           |       |           |        |       |         |              |                   |          |           |          |           |          |           |          |          |          |          |           |           |
| Cambodian                                            | 7         | 14     | 8         | 0     | 0         | 8      | 0.658 | 0       | 0.540        | 0.001             | 0.23911  | 0.6579    | 0.63143  | 0.5975    | 0.59556  | 0.7231    | 1.22480  | 0.8609   | 1.07118  | 0.8642   | -1.62308  | 0.2999    |
| Han                                                  | 12        | 24     | 7         | 0     | 0         | 6      | 0.717 | 0       | 0.790        | 0.001             | 0.62606  | 0.7721    | 1.2873   | 0.8591    | 1.2708   | 0.9171    | 1.28513  | 0.8561   | 1.15965  | 0.8762   | -1.12319  | 0.2442    |
| Japanese                                             | 11        | 22     | 8         | 1     | 0         | 4      | 0.571 | 5       | 0.690        | 0.001             | -0.32991 | 0.4136    | -1.57145 | 0.05*     | -1.40583 | 0.1209    | -1.47902 | 0.091    | -1.50160 | 0.0109   | -1.92208  | 0.20920   |
| Papuan                                               | 9         | 18     | 19        | 1     | 2         | 5      | 0.614 | 15      | 0.980        | 0.002             | -1.91147 | 0.0114**  | -2.44478 | 0.0241*   | -2.65381 | 0.0169    | -0.59660 | 0.288    | -1.26041 | 0.16370  | -12.86275 | 0.0999    |
| Yakut                                                | 11        | 22     | 4         | 0     | 0         | 3      | 0.541 | 1       | 0.540        | 0.000             | 1.147    | 0.8851    | 0.14251  | 0.723     | 0.48993  | 0.6889    | -0.21459 | 0.34     | 0.06212  | 0.50170  | -0.64069  | 0.2447    |
| <b>Americas</b>                                      |           |        |           |       |           |        |       |         |              |                   |          |           |          |           |          |           |          |          |          |          |           |           |
| Karitiana                                            | 11        | 22     | 4         | 1     | 0         | 3      | 0.558 | 1       | 0.560        | 0.000             | 1.31319  | 0.9108    | 0.14251  | 0.723     | 0.54376  | 0.7078    | -0.21459 | 0.3412   | 0.10649  | 0.354    | 0.39827   | 0.41020   |
| Pima                                                 | 12        | 24     | 6         | 0     | 0         | 6      | 0.717 | 0       | 0.900        | 0.001             | 1.83144  | 0.9714    | 1.23249  | 0.8209    | 1.63065  | 0.9748    | 1.20330  | 0.8236   | 1.54674  | 0.5964   | -0.65942  | 0.26870   |
| All values were calculated using DNAsp (Rosas, 1995) |           |        |           |       |           |        |       |         |              |                   |          |           |          |           |          |           |          |          |          |          |           |           |
|                                                      | *         | p<0.05 |           | **    | p<0.01    |        | ***   | p<0.001 |              |                   |          |           |          |           |          |           |          |          |          |          |           |           |
|                                                      | $\alpha'$ | 0.008  | $\alpha'$ | 0.002 | $\alpha'$ | 0.0002 |       |         |              |                   |          |           |          |           |          |           |          |          |          |          |           |           |

|                     | N   | 2N  | S  | s | r  | H  | HD    | $S_i$ | $\pi (*10^3)$ | $\theta (*10^3)$ | TD     | P(TD<obs) | D*     | P(D*<obs) | F*     | P(F*<obs) | D      | P(D<obs) | F      | P(F<obs) | H      | P(H<obs) |
|---------------------|-----|-----|----|---|----|----|-------|-------|---------------|------------------|--------|-----------|--------|-----------|--------|-----------|--------|----------|--------|----------|--------|----------|
| <b>NAT2</b>         |     |     |    |   |    |    |       |       |               |                  |        |           |        |           |        |           |        |          |        |          |        |          |
| <b>Africa</b>       | 194 | 388 | 45 | 3 | 15 | 68 | .914  | 9     | 1.860         | 2.320            | -0.556 | 0.571     | -0.647 | 0.294     | -0.730 | 0.254     | -0.669 | 0.274    | -0.745 | 0.245    | 0.822  | 0.394    |
| <b>E Africa</b>     | 91  | 182 | 38 | 2 | 12 | 40 | 0.875 | 9     | 1.940         | 2.230            | -0.382 | 0.4165    | -0.705 | 0.273     | -0.683 | 0.257     | -0.751 | 0.242    | -0.713 | 0.269    | 0.714  | 0.393    |
| <b>W Africa</b>     | 53  | 106 | 27 | 3 | 9  | 27 | .875  | 11    | 1.710         | 1.700            | 0.023  | 0.6698    | -2.112 | 0.0247*   | -1.536 | 0.075     | -2.261 | 0.0344*  | -1.622 | 0.068    | 0.013  | 0.322    |
| <b>Pygmy groups</b> | 31  | 62  | 23 | 2 | 8  | 24 | 0.952 | 4     | 1.620         | 1.620            | 0.014  | 0.582     | 0.347  | 0.559     | 0.270  | 0.632     | 0.347  | 0.717    | 0.267  | 0.644    | 0.167  | 0.345    |
| <b>Europe</b>       | 46  | 92  | 21 | 2 | 5  | 26 | 0.887 | 3     | 1.730         | 1.360            | 0.797  | 0.830     | 0.493  | 0.611     | 0.724  | 0.794     | 0.502  | 0.777    | 0.740  | 0.813    | 0.323  | 0.356    |
| <b>Asia</b>         | 31  | 62  | 11 | 2 | 3  | 15 | 0.798 | 0     | 0.930         | 0.770            | 0.586  | 0.779     | 1.437  | 1.000     | 1.358  | 0.934     | 1.492  | 0.915    | 1.406  | 0.943    | 0.876  | 0.611    |
| <b>Americas</b>     | 14  | 28  | 10 | 2 | 3  | 9  | 0.799 | 0     | 1.040         | 0.850            | 0.717  | 0.802     | 1.406  | 1.000     | 1.398  | 0.946     | 1.503  | 0.920    | 1.498  | 0.949    | -0.529 | 0.230    |
| <b>Africa</b>       |     |     |    |   |    |    |       |       |               |                  |        |           |        |           |        |           |        |          |        |          |        |          |
| Baka Pygmy          | 9   | 18  | 17 | 2 | 6  | 12 | .935  | 4     | 1.590         | 1.630            | -0.092 | 0.515     | 0.363  | 0.573     | 0.269  | 0.599     | 0.333  | 0.561    | 0.242  | 0.602    | -0.941 | 0.236    |
| Bakola Pygmy        | 7   | 14  | 15 | 1 | 3  | 8  | .857  | 2     | 1.660         | 1.560            | 0.283  | 0.662     | 0.913  | 0.815     | 0.851  | 0.814     | 0.990  | 0.813    | 0.944  | 0.825    | 0.088  | 0.330    |
| Biaka Pygmy         | 15  | 30  | 20 | 2 | 7  | 16 | 0.945 | 7     | 1.550         | 1.670            | -0.238 | 0.466     | -0.554 | 0.225     | -0.533 | 0.266     | -0.699 | 0.212    | -0.654 | 0.292    | -0.248 | 0.301    |
| Burunge             | 17  | 34  | 21 | 2 | 8  | 11 | 0.838 | 6     | 1.960         | 1.690            | 0.534  | 0.762     | -0.222 | 0.321     | 0.029  | 0.513     | 0.048  | 0.733    | 0.263  | 0.613    | 0.299  | 0.347    |
| Dinka               | 13  | 26  | 21 | 2 | 7  | 10 | 0.818 | 9     | 1.950         | 1.820            | 0.261  | 0.658     | -0.930 | 0.151     | -0.656 | 0.225     | -1.159 | 0.184    | -0.825 | 0.247    | 0.603  | 0.395    |
| Fulani              | 13  | 26  | 15 | 2 | 4  | 8  | 0.757 | 4     | 1.750         | 1.310            | 1.176  | 0.908     | 0.051  | 0.575     | 0.460  | 0.720     | 0.413  | 0.739    | 0.797  | 0.796    | -0.637 | 0.236    |
| Hadzabe             | 14  | 28  | 20 | 2 | 5  | 12 | 0.844 | 6     | 1.610         | 1.700            | -0.179 | 0.484     | -0.204 | 0.462     | -0.230 | 0.376     | 0.049  | 0.450    | -0.034 | 0.506    | -2.392 | 0.149    |
| Kanuri              | 12  | 24  | 14 | 2 | 4  | 12 | 0.924 | 2     | 1.360         | 1.240            | 0.343  | 0.697     | 0.738  | 0.717     | 0.722  | 0.805     | 0.775  | 0.709    | 0.766  | 0.781    | 0.754  | 0.449    |
| Lemande             | 14  | 28  | 20 | 3 | 6  | 16 | 0.921 | 6     | 1.840         | 1.700            | 0.310  | 0.693     | -0.204 | 0.456     | -0.050 | 0.453     | 0.049  | 0.458    | 0.166  | 0.583    | 0.291  | 0.350    |
| Maasai              | 14  | 28  | 20 | 2 | 6  | 15 | 0.929 | 6     | 1.930         | 1.700            | 0.482  | 0.734     | -0.204 | 0.460     | 0.014  | 0.485     | -0.302 | 0.457    | -0.045 | 0.496    | 0.275  | 0.354    |
| Mada                | 14  | 28  | 19 | 2 | 7  | 10 | 0.828 | 8     | 1.730         | 1.610            | 0.256  | 0.657     | -0.932 | 0.210     | -0.656 | 0.238     | -0.774 | 0.299    | -0.516 | 0.350    | -0.487 | 0.270    |
| S African San       | 7   | 14  | 14 | 2 | 3  | 7  | 0.824 | 6     | 1.310         | 1.450            | -0.400 | 0.386     | -0.397 | 0.279     | -0.455 | 0.298     | -0.230 | 0.496    | -0.339 | 0.410    | -2.066 | 0.140    |
| Sandawe             | 18  | 36  | 21 | 2 | 6  | 13 | 0.838 | 4     | 1.980         | 1.670            | 0.630  | 0.796     | 0.387  | 0.587     | 0.551  | 0.764     | 0.385  | 0.581    | 0.569  | 0.733    | 1.041  | 0.468    |
| Turu                | 15  | 30  | 25 | 2 | 8  | 17 | 0.915 | 11    | 1.900         | 2.170            | -0.443 | 0.364     | -1.053 | 0.144     | -1.008 | 0.168     | -1.001 | 0.195    | -0.978 | 0.205    | 0.680  | 0.392    |
| Yoruba              | 12  | 24  | 17 | 2 | 7  | 15 | 0.946 | 3     | 1.670         | 1.500            | 0.410  | 0.723     | 0.576  | 0.661     | 0.613  | 0.748     | 0.594  | 0.802    | 0.644  | 0.743    | 1.797  | 0.690    |
| <b>Europe</b>       |     |     |    |   |    |    |       |       |               |                  |        |           |        |           |        |           |        |          |        |          |        |          |
| French              | 8   | 16  | 12 | 2 | 3  | 9  | 0.883 | 1     | 1.760         | 1.190            | 1.814  | 0.978     | 1.082  | 0.856     | 1.478  | 0.963     | 1.177  | 0.961    | 1.647  | 0.964    | 1.600  | 0.735    |
| Druze               | 10  | 20  | 14 | 2 | 4  | 11 | 0.916 | 1     | 1.720         | 1.300            | 1.178  | 0.914     | 1.140  | 0.965     | 1.336  | 0.942     | 1.247  | 0.879    | 1.477  | 0.939    | 1.905  | 0.787    |
| Sardinian           | 11  | 22  | 13 | 2 | 3  | 8  | 0.831 | 2     | 1.680         | 1.180            | 1.523  | 0.951     | 0.690  | 0.856     | 1.089  | 0.886     | 0.718  | 0.849    | 1.170  | 0.890    | 2.199  | 0.934    |
| Brahui              | 11  | 22  | 16 | 2 | 3  | 11 | 0.9   | 3     | 1.750         | 1.450            | 0.749  | 0.822     | 0.535  | 0.653     | 0.698  | 0.771     | 0.544  | 0.778    | 0.736  | 0.777    | 0.589  | 0.408    |
| Russian             | 6   | 12  | 13 | 2 | 4  | 8  | 0.909 | 2     | 1.860         | 1.420            | 1.310  | 0.929     | 0.852  | 0.776     | 1.104  | 0.891     | 0.904  | 0.889    | 1.232  | 0.890    | 1.455  | 0.635    |
| <b>Asia</b>         |     |     |    |   |    |    |       |       |               |                  |        |           |        |           |        |           |        |          |        |          |        |          |
| Cambodian           | 7   | 14  | 7  | 1 | 2  | 7  | 0.846 | 0     | 1.040         | 0.730            | 1.597  | 0.956     | 1.331  | 1.0       | 1.601  | 0.972     | 1.430  | 1.000    | 1.763  | 0.969    | 0.000  | 0.335    |
| Han                 | 10  | 20  | 9  | 2 | 3  | 7  | 0.753 | 2     | 0.810         | 0.840            | -0.100 | 0.513     | 0.346  | 0.514     | 0.253  | 0.585     | 0.315  | 0.503    | 0.227  | 0.579    | 0.295  | 0.402    |
| Japanese            | 9   | 18  | 8  | 1 | 2  | 5  | 0.732 | 2     | 0.740         | 0.770            | -0.116 | 0.510     | 0.253  | 0.700     | 0.173  | 0.543     | 0.203  | 0.466    | 0.130  | 0.547    | 0.261  | 0.392    |
| Papuan              | 2   | 4   | 3  | 1 | 1  | 2  | 0.5   | 3     | 0.490         | 0.540            | na     | na        | na     | na        | na     | na        | na     | na       | na     | na       | na     | na       |
| Yakut               | 3   | 6   | 9  | 2 | 2  | 5  | 0.933 | 4     | 1.410         | 1.300            | na     | na        | na     | na        | na     | na        | na     | na       | na     | na       | na     | na       |
| <b>Americas</b>     |     |     |    |   |    |    |       |       |               |                  |        |           |        |           |        |           |        |          |        |          |        |          |
| Karitiana           | 10  | 20  | 10 | 2 | 3  | 9  | 0.853 | 0     | 1.130         | 0.930            | 0.767  | 0.819     | 1.410  | 0.931     | 1.419  | 0.951     | 1.533  | 0.931    | 1.557  | 0.951    | 0.032  | 0.330    |
| Pima                | 5   | 10  | 5  | 1 | 2  | 3  | 0.679 | 2     | 0.700         | 0.640            | na     | na        | na     | na        | na     | na        | na     | na       | na     | na       | na     | na       |

All values were calculated using DNAsp (Rosas, 1995)

na -Tests of neutrality were not performed on populations with N<5

\*p<0.05  $\alpha$ 0.008

|                 | N   | 2N  | S  | s | r | H   | HD    | Si | $\pi (*10^3)$ | $\theta\alpha(*10^3)$ | TD     | P(TD<obs) | D*     | P(D*<obs) | F*     | P(F*<obs) | D      | P(D<obs) | F      | P(F<obs) | H       | P(H<obs) |
|-----------------|-----|-----|----|---|---|-----|-------|----|---------------|-----------------------|--------|-----------|--------|-----------|--------|-----------|--------|----------|--------|----------|---------|----------|
| <b>NATPI</b>    |     |     |    |   |   |     |       |    |               |                       |        |           |        |           |        |           |        |          |        |          |         |          |
| Africa          | 197 | 394 | 50 | - | - | 131 | 0.960 | 6  | 1.800         | 2.640                 | -0.896 | 0.193     | 0.249  | 0.644     | -0.337 | 0.401     | 0.772  | 0.767    | 0.010  | 0.551    | -8.200  | 0.052    |
| E Africa        | 93  | 186 | 44 | - | - | 59  | 0.930 | 7  | 1.700         | 2.690                 | -1.095 | 0.125     | -0.008 | 0.517     | -0.574 | 0.304     | 0.755  | 0.754    | -0.057 | 0.510    | -10.306 | 0.037*   |
| W Africa        | 66  | 132 | 40 | - | - | 59  | 0.964 | 6  | 1.790         | 2.550                 | -0.907 | 0.187     | 0.445  | 0.734     | -0.137 | 0.476     | 0.358  | 0.606    | -0.223 | 0.448    | -5.479  | 0.091    |
| Pygmy groups    | 16  | 32  | 27 | - | - | 27  | 0.977 | 5  | 2.810         | 2.530                 | 0.403  | 0.721     | 0.156  | 0.519     | 0.280  | 0.626     | 0.825  | 0.855    | 0.913  | 0.834    | -0.702  | 0.268    |
| Europe          | 52  | 104 | 17 | - | - | 23  | 0.915 | 7  | 0.860         | 1.110                 | -0.614 | 0.314     | -2.365 | 0.031     | -2.049 | 0.036*    | -1.779 | 0.067    | -1.568 | 0.082    | -0.879  | 0.201    |
| Asia            | 35  | 70  | 14 | - | - | 15  | 0.824 | 2  | 0.840         | 0.990                 | -0.424 | 0.396     | 0.498  | 0.793     | 0.208  | 0.594     | 0.302  | 0.583    | -0.034 | 0.501    | 1.103   | 0.625    |
| Americas        | 20  | 40  | 4  | - | - | 7   | 0.776 | 1  | 0.550         | 0.400                 | 0.972  | 0.853     | 0.191  | 0.651     | 0.501  | 0.659     | 1.040  | 1.00     | 1.025  | 0.816    | -1.274  | 0.799    |
| <b>Africa</b>   |     |     |    |   |   |     |       |    |               |                       |        |           |        |           |        |           |        |          |        |          |         |          |
| Baka Pygmy      | 9   | 18  | 27 | - | - | 16  | 0.987 | 9  | 2.780         | 2.760                 | 0.030  | 0.568     | -0.261 | 0.382     | -0.205 | 0.413     | 0.205  | 0.636    | 0.218  | 0.589    | -1.464  | 0.234    |
| Bakola Pygmy    | 7   | 14  | 21 | - | - | 12  | 0.967 | 3  | 2.610         | 2.240                 | 0.699  | 0.797     | 0.683  | 0.730     | 0.788  | 0.800     | 0.946  | 0.831    | 1.113  | 0.863    | -0.264  | 0.304    |
| Biaka Pygmy     | 15  | 30  | 30 | - | - | 19  | 0.947 | 8  | 1.640         | 2.400                 | -1.137 | 0.125     | -0.396 | 0.303     | -0.748 | 0.220     | 0.455  | 0.723    | -0.084 | 0.492    | -3.899  | 0.132    |
| Burunge         | 18  | 36  | 27 | - | - | 15  | 0.905 | 3  | 1.640         | 2.210                 | -0.889 | 0.195     | 0.960  | 0.923     | 0.405  | 0.674     | 1.236  | 0.924    | 0.558  | 0.727    | -5.448  | 0.082    |
| Dinka           | 15  | 30  | 28 | - | - | 20  | 0.954 | 7  | 1.620         | 2.400                 | -1.164 | 0.107     | -0.631 | 0.209     | -0.945 | 0.184     | 0.018  | 0.456    | -0.381 | 0.380    | 0.349   | 0.349    |
| Fulani          | 13  | 26  | 28 | - | - | 20  | 0.960 | 12 | 1.640         | 2.490                 | -1.265 | 0.087     | -0.967 | 0.182     | -1.244 | 0.131     | -0.610 | 0.302    | -1.026 | 0.207    | -5.428  | 0.084    |
| Hadzabe         | 14  | 28  | 26 | - | - | 14  | 0.918 | 10 | 1.570         | 2.350                 | -1.213 | 0.103     | -0.896 | 0.179     | -1.172 | 0.139     | -0.464 | 0.327    | -0.841 | 0.248    | -2.899  | 0.165    |
| Kanuri          | 13  | 26  | 21 | - | - | 16  | 0.945 | 3  | 1.930         | 1.870                 | 0.126  | 0.622     | 0.773  | 0.767     | 0.670  | 0.768     | 0.642  | 0.750    | 0.546  | 0.715    | -0.382  | 0.279    |
| Lemande         | 14  | 28  | 22 | - | - | 16  | 0.950 | 2  | 1.810         | 2.000                 | -0.338 | 0.426     | 0.846  | 0.877     | 0.553  | 0.730     | 1.487  | 0.750    | 1.075  | 0.876    | -1.783  | 0.188    |
| Maasai          | 13  | 26  | 25 | - | - | 18  | 0.929 | 7  | 1.810         | 2.220                 | -0.678 | 0.274     | -0.046 | 0.511     | -0.285 | 0.388     | 0.008  | 0.505    | -0.297 | 0.407    | -3.126  | 0.140    |
| Mada            | 14  | 28  | 22 | - | - | 19  | 0.955 | 4  | 1.610         | 1.920                 | -0.564 | 0.318     | 0.523  | 0.785     | 0.211  | 0.595     | 0.752  | 0.774    | 0.417  | 0.671    | -1.328  | 0.216    |
| S African San   | 7   | 14  | 17 | - | - | 11  | 0.934 | 6  | 1.700         | 1.920                 | -0.464 | 0.352     | -0.228 | 0.383     | -0.336 | 0.364     | 0.443  | 0.738    | 0.246  | 0.603    | -1.934  | 0.175    |
| Sandawe         | 18  | 36  | 26 | - | - | 19  | 0.879 | 9  | 1.810         | 2.210                 | -0.624 | 0.305     | -0.857 | 0.198     | -0.922 | 0.192     | -0.530 | 0.261    | -0.648 | 0.290    | -0.654  | 0.271    |
| Turu            | 15  | 30  | 24 | - | - | 15  | 0.929 | 7  | 1.450         | 2.050                 | -1.049 | 0.147     | -0.196 | 0.452     | -0.553 | 0.289     | -0.062 | 0.443    | -0.535 | 0.331    | -1.241  | 0.229    |
| Yoruba          | 12  | 24  | 32 | - | - | 17  | 0.971 | 13 | 1.920         | 3.000                 | -1.361 | 0.071     | -0.699 | 0.226     | -1.059 | 0.162     | -0.400 | 0.348    | -0.879 | 0.237    | -3.435  | 0.166    |
| <b>Europe</b>   |     |     |    |   |   |     |       |    |               |                       |        |           |        |           |        |           |        |          |        |          |         |          |
| French          | 11  | 22  | 7  | - | - | 13  | 0.939 | 1  | 0.810         | 0.650                 | 0.775  | 0.819     | 0.650  | 0.861     | 0.795  | 0.784     | 1.366  | 1.000    | 1.414  | 0.923    | -1.039  | 0.156    |
| Druze           | 11  | 22  | 8  | - | - | 11  | 0.922 | 3  | 0.890         | 0.840                 | 0.198  | 0.624     | -0.220 | 0.436     | -0.114 | 0.446     | -0.523 | 0.423    | -0.341 | 0.395    | 1.212   | 0.811    |
| Sardinian       | 12  | 24  | 8  | - | - | 12  | 0.917 | 1  | 0.910         | 0.730                 | 0.802  | 0.826     | 0.737  | 0.885     | 0.879  | 0.821     | 0.632  | 0.657    | 0.799  | 0.782    | 1.188   | 0.817    |
| Brahui          | 12  | 24  | 13 | - | - | 14  | 0.906 | 6  | 0.950         | 1.180                 | -0.682 | 0.826     | -1.380 | 0.130     | -1.364 | 0.113     | -1.615 | 0.110    | -1.496 | 0.111    | 0.500   | 0.417    |
| Russian         | 6   | 12  | 4  | - | - | 4   | 0.652 | 1  | 0.500         | 0.450                 | 0.426  | 0.692     | 0.368  | 0.459     | 0.433  | 0.648     | 0.301  | 0.440    | 0.393  | 0.646    | -0.303  | 0.249    |
| <b>Asia</b>     |     |     |    |   |   |     |       |    |               |                       |        |           |        |           |        |           |        |          |        |          |         |          |
| Cambodian       | 7   | 14  | 5  | - | - | 5   | 0.802 | 2  | 0.750         | 0.640                 | 0.613  | 0.757     | 0.020  | 0.537     | 0.202  | 0.546     | -0.351 | 0.258    | -0.202 | 0.480    | 0.352   | 0.465    |
| Han             | 12  | 24  | 7  | - | - | 8   | 0.812 | 2  | 0.700         | 0.640                 | 0.336  | 0.678     | -0.029 | 0.606     | 0.090  | 0.534     | -0.315 | 0.342    | -0.210 | 0.425    | 0.326   | 0.409    |
| Japanese        | 10  | 20  | 11 | - | - | 7   | 0.805 | 1  | 1.020         | 1.050                 | -0.091 | 0.515     | 0.997  | 0.606     | 0.792  | 0.799     | 0.901  | 0.807    | 0.611  | 0.731    | 1.653   | 0.831    |
| Papuan          | 2   | 4   | 2  | - | - | 2   | 0.500 | 2  | 0.340         | 0.370                 | na     | na        | na     | na        | na     | na        | na     | na       | na     | na       | na      | na       |
| Yakut           | 4   | 8   | 9  | - | - | 6   | 0.929 | 7  | 0.930         | 1.180                 | na     | na        | na     | na        | na     | na        | na     | na       | na     | na       | na      | na       |
| <b>Americas</b> |     |     |    |   |   |     |       |    |               |                       |        |           |        |           |        |           |        |          |        |          |         |          |
| Karitiana       | 10  | 20  | 4  | - | - | 7   | 0.774 | 1  | 0.560         | 0.480                 | 0.528  | 0.738     | 0.387  | 0.725     | 0.492  | 0.699     | 1.133  | 0.718    | 0.963  | 0.777    | -1.211  | 0.097    |
| Pima            | 10  | 20  | 4  | - | - | 5   | 0.795 | 0  | 0.560         | 0.380                 | 1.362  | 0.913     | 1.108  | 1.000     | 1.358  | 0.929     | 1.012  | 0.726    | 1.200  | 0.853    | 0.674   | 0.768    |

All values were calculated using DNAsp (Rosas, 1995)  
na -Tests of neutrality were not performed on populations with N<5  
\* $p<0.05$   $\alpha=0.008$
