# Supplementary material
Source: PubMed Central journal article supplement (PMC4653814)
Supplement: NIHMS517703-supplement-Supplementary_11.pdf [file NIHMS517703-supplement-Supplementary_11.pdf]

**NATI**

| <b>SNP</b> | <b>Position relative to NAT ORF*</b> | <b>Nucleotide variant</b> | <b>Ancestral nucleotide (P. trog.)</b> | <b>re identifier**</b> |
|------------|--------------------------------------|---------------------------|----------------------------------------|------------------------|
| 1          | -1048                                | C/G                       | G                                      | rs8190843              |
| 2          | -1044                                | A/C                       | A                                      | NA                     |
| 3          | -1037                                | A/G                       | A                                      | NA                     |
| 4          | -1144                                | C/G                       | C                                      | NA                     |
| 5          | -970                                 | C/T                       | C                                      | NA                     |
| 6          | -943                                 | C/T                       | C                                      | rs8190844              |
| 7          | -929                                 | A/G                       | G                                      | rs8190845              |
| 8          | -920                                 | C/G                       | C                                      | NA                     |
| 9          | -868                                 | A/G                       | C                                      | rs8190846              |
| 10         | -844                                 | A/G                       | G                                      | rs8190847              |
| 11         | -826                                 | C/T                       | C                                      | rs8190848              |
| 12         | -433                                 | C/T                       | T                                      | rs8190856              |
| 13         | -426                                 | C/T                       | C                                      | NA                     |
| 14         | -344                                 | C/T                       | T                                      | rs4986988              |
| 15         | -278                                 | A/T                       | G                                      | rs17126356             |
| 16         | -40                                  | A/T                       | T                                      | rs4986989              |
| 17         | -36                                  | A/T                       | A                                      | rs8190857              |
| 18         | +21                                  | G/T                       | T                                      | rs4986992              |
| 19         | +236                                 | C/G                       | G                                      | NA                     |
| 20         | +445                                 | A/G                       | A                                      | rs4987076              |
| 21         | +459                                 | A/G                       | G                                      | rs4986990              |
| 22         | +639                                 | G/T                       | G                                      | rs4986783              |
| 23         | +662                                 | A/G                       | A                                      | NA                     |
| 24         | +758                                 | A/T                       | A                                      | NA                     |
| 25         | +777                                 | C/T                       | T                                      | rs4986991              |
| 26         | +956                                 | C/G                       | C                                      | NA                     |
| 27         | +1088                                | A/T                       | T                                      | rs1057126/rs8190861    |
| 28         | +1095                                | A/C                       | A                                      | rs15561                |
| 29         | +1191                                | G/T                       | T                                      | rs4986993              |
| 30         | +1236                                | A/G                       | A                                      | rs4987077              |
| 31         | +1245                                | C/T                       | T                                      | NA                     |
| 32         | +1454                                | C/T                       | T                                      | rs8190864              |
| 33         | +1527                                | A/G                       | A                                      | NA                     |
| 34         | +1572                                | C/T                       | T                                      | NA                     |
| 35         | +1641                                | A/C                       | A                                      | rs8190865              |
| 36         | +1654                                | A/G                       | G                                      | NA                     |
| 37         | +1685                                | A/G                       | G                                      | NA                     |
| 38         | +1688                                | A/G                       | A                                      | rs8190868              |
| 39         | +1692                                | A/G                       | G                                      | rs8190869              |
| 40         | +1715                                | C/T                       | T                                      | rs8190870              |
| 41         | +1734                                | A/T                       | A                                      | rs8190871              |
| 42         | +1784                                | A/G                       | A                                      | NA                     |
| 43         | +1787                                | A/T                       | A                                      | rs8190872              |
| 44         | +1834                                | A/G                       | A                                      | rs8190873              |
| 45         | +1910                                | A/G                       | A                                      | rs9650591              |
| 46         | +1960                                | C/G                       | G                                      | rs8190874              |
| 47         | +1961                                | A/G                       | G                                      | rs8190875              |
| 48         | +1969                                | G/T                       | G                                      | NA                     |

\*SNP numbering is relative to the "A" of the ATG translation initiation codon as +1.

\*\*Reference cluster ID numbers (rs) in dbSNP Entrez.

**NAT2**

| SNP | Position relative to NAT ORF* | Nucleotide variant | Ancestral nucleotide (P. trog.) | re identifier** |
|-----|-------------------------------|--------------------|---------------------------------|-----------------|
| 1   | -1014                         | C/T                | C                               | NA              |
| 2   | -862                          | C/G                | G                               | rs41319551      |
| 3   | -859                          | C/T                | C                               | rs11782802      |
| 4   | -855                          | C/T                | C                               | rs973874        |
| 5   | -701                          | A/G                | G                               | NA              |
| 6   | -491                          | A/G                | G                               | rs1495744       |
| 7   | -413                          | A/G                | G                               | rs45529434      |
| 8   | -349                          | C/T                | T                               | NA              |
| 9   | -282                          | C/T                | T                               | NA              |
| 10  | -255                          | C/G                | C                               | rs45605531      |
| 11  | -234                          | C/T                | C                               | rs7832071       |
| 12  | -179                          | C/T                | T                               | rs45472694      |
| 13  | +70                           | A/T                | T                               | rs45477599      |
| 14  | +191                          | A/G                | G                               | rs1801279       |
| 15  | +282                          | C/T                | C                               | rs1041983       |
| 16  | +308                          | C/T                | C                               | NA              |
| 17  | +341                          | C/T                | T                               | rs1801280       |
| 18  | +403                          | C/G                | C                               | rs12720065      |
| 19  | +472                          | A/C                | A                               | NA              |
| 20  | +481                          | C/T                | C                               | rs1799929       |
| 21  | +518                          | A/G                | A                               | NA              |
| 22  | +578                          | C/T                | C                               | NA              |
| 23  | +590                          | A/G                | G                               | rs1799930       |
| 24  | +609                          | G/T                | G                               | rs45618543      |
| 25  | +632                          | A/G                | G                               | NA              |
| 26  | +664                          | G/T                | T                               | NA              |
| 27  | +766                          | A/G                | A                               | rs55700793      |
| 28  | +803                          | A/G                | A                               | rs1208          |
| 29  | +838                          | A/G                | G                               | rs56393504      |
| 30  | +857                          | A/G                | G                               | rs1799931       |
| 31  | +1021                         | C/T                | T                               | rs2552          |
| 32  | +1085                         | A/G                | G                               | NA              |
| 33  | +1101                         | C/G                | C                               | rs45539742      |
| 34  | +1134                         | C/T                | C                               | rs56011639      |
| 35  | +1338                         | A/G                | A                               | rs45543435      |
| 36  | +1362                         | A/C                | C                               | NA              |
| 37  | +1373                         | G/T                | T                               | NA              |
| 38  | +1395                         | A/G                | G                               | rs4646247       |
| 39  | +1447                         | C/T                | C                               | rs971473        |
| 40  | +1520                         | A/T                | A                               | NA              |
| 41  | +1521                         | C/G                | C                               | rs45547533      |
| 42  | +1781                         | C/T                | T                               | NA              |
| 43  | +1783                         | C/G                | G                               | NA              |
| 44  | +1792                         | A/G                | A                               | NA              |
| 45  | +1794                         | C/T                | T                               | NA              |
| 46  | +1853                         | C/T                | T                               | NA              |

\*SNP numbering is relative to the "A" of the ATG translation initiation codon as +1.

\*\*Reference cluster ID numbers (rs) in dbSNP Entrez.

**NATP1**

| SNP | Position relative to NAT ORF* | Nucleotide variant | Ancestral nucleotide (P. trog.) | re identifier** |
|-----|-------------------------------|--------------------|---------------------------------|-----------------|
| 1   | -1039                         | C/T                | C                               | NA              |
| 2   | -1034                         | A/T                | T                               | rs73590281      |
| 3   | -1003                         | A/G                | A                               | rs13278827      |
| 4   | -984                          | A/T                | T                               | NA              |
| 5   | -976                          | C/T                | T                               | NA              |
| 6   | -861                          | A/T                | T                               | NA              |
| 7   | -805                          | A/C                | T                               | NA              |
| 8   | -743                          | C/G                | G                               | NA              |
| 9   | -717                          | G/T                | G                               | NA              |
| 10  | -649                          | A/G                | A                               | NA              |
| 11  | -646                          | C/T                | C                               | NA              |
| 12  | -464                          | C/T                | T                               | NA              |
| 13  | -336                          | C/T                | A                               | rs73590284      |
| 14  | -281                          | C/T                | T                               | rs12334336      |
| 15  | -272                          | C/T                | T                               | rs4487818       |
| 16  | -178                          | A/G                | A                               | rs73590288      |
| 17  | -13                           | C/T                | T                               | NA              |
| 18  | 1 (ATG)                       | A/G                | A                               | rs10088180      |
| 19  | +56                           | A/G                | G                               | NA              |
| 20  | +130                          | C/T                | T                               | rs73590295      |
| 21  | +169                          | A/T                | A                               | NA              |
| 22  | +175                          | A/C                | A                               | rs2898473       |
| 23  | +293                          | A/G                | G                               | NA              |
| 24  | +309                          | C/T                | G                               | NA              |
| 25  | +501                          | C/T                | G                               | rs35548819      |
| 26  | +714                          | C/T                | T                               | rs73666630      |
| 27  | +883                          | C/G                | G                               | rs73590297      |
| 28  | +904                          | C/T                | T                               | rs2172426       |
| 29  | +982                          | A/G                | A                               | NA              |
| 30  | +988                          | C/T                | T                               | NA              |
| 31  | +989                          | A/C                | A                               | NA              |
| 32  | +1072                         | C/T                | T                               | rs12548816      |
| 33  | +1096                         | A/G                | G                               | rs57181121      |
| 34  | +1123                         | C/T                | T                               | rs73590300      |
| 35  | +1129                         | G/T                | T                               | NA              |
| 36  | +1131                         | G/T                | T                               | NA              |
| 37  | +1153                         | A/G                | G                               | NA              |
| 38  | +1183                         | C/T                | T                               | rs13254216      |
| 39  | +1205                         | A/C                | A                               | NA              |
| 40  | +1211                         | C/T                | C                               | NA              |
| 41  | +1226                         | C/T                | T                               | NA              |
| 42  | +1362                         | A/T                | T                               | rs73590302      |
| 43  | +1387                         | C/G                | C                               | rs17126565      |
| 44  | +1417                         | C/G                | T                               | rs17126568      |
| 45  | +1461                         | C/T                | T                               | NA              |
| 46  | +1483                         | C/T                | T                               | NA              |
| 47  | +1490                         | A/C                | A                               | NA              |
| 48  | +1507                         | A/G                | A                               | NA              |
| 49  | +1587                         | A/C                | A                               | rs17126570      |
| 50  | +1607                         | A/G                | G                               | NA              |
| 51  | +1617                         | A/G                | A                               | rs17126572      |
| 52  | +1665                         | C/G                | G                               | rs73666631      |
| 53  | +1720                         | C/T                | T                               | rs73592108      |
| 54  | +1761                         | A/T                | A                               | rs28504072      |
| 55  | +1795                         | A/G                | G                               | NA              |

\*SNP numbering is relative to consensus alignment with both NAT1 and NAT2, where the "A" of the ATG translation initiation codon as +1.

\*\*Reference cluster ID numbers (rs) in dbSNP Entrez.
