# Supplementary material
Source: PubMed Central journal article supplement (PMC4653814)

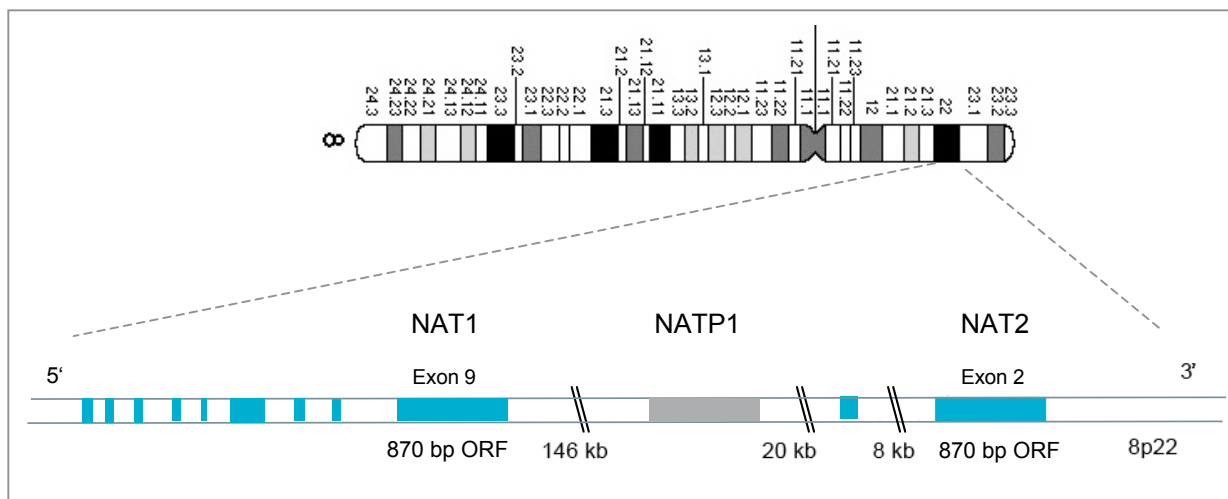

**a. NAT1**

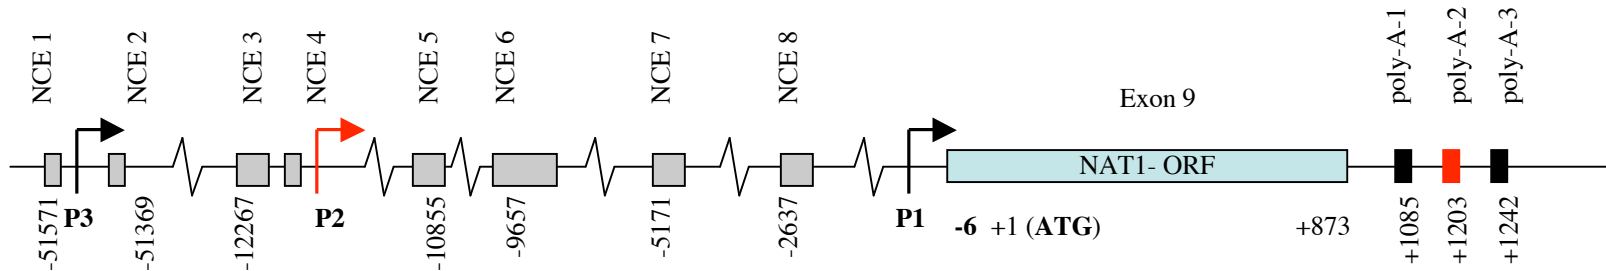

**b. NAT2**

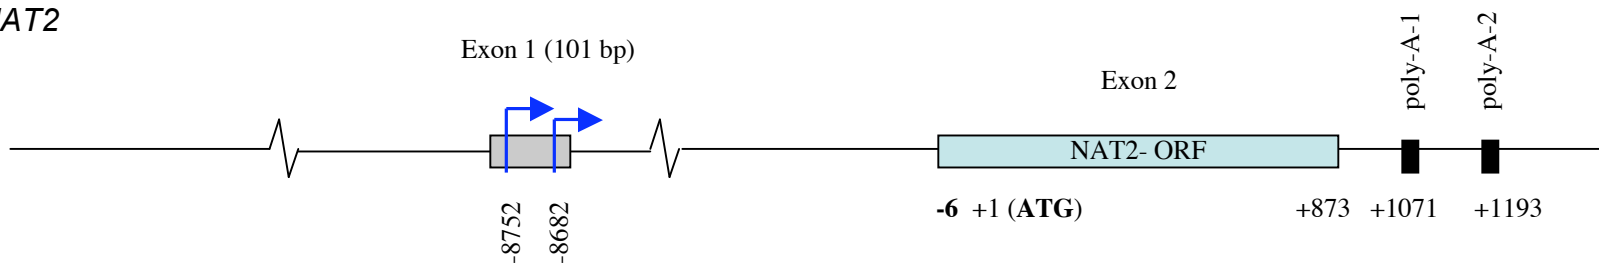

Supplement: NIHMS517703-supplement-Supplementary_1.pdf [file NIHMS517703-supplement-Supplementary_1.pdf]

# NAT Region HapMap CEU

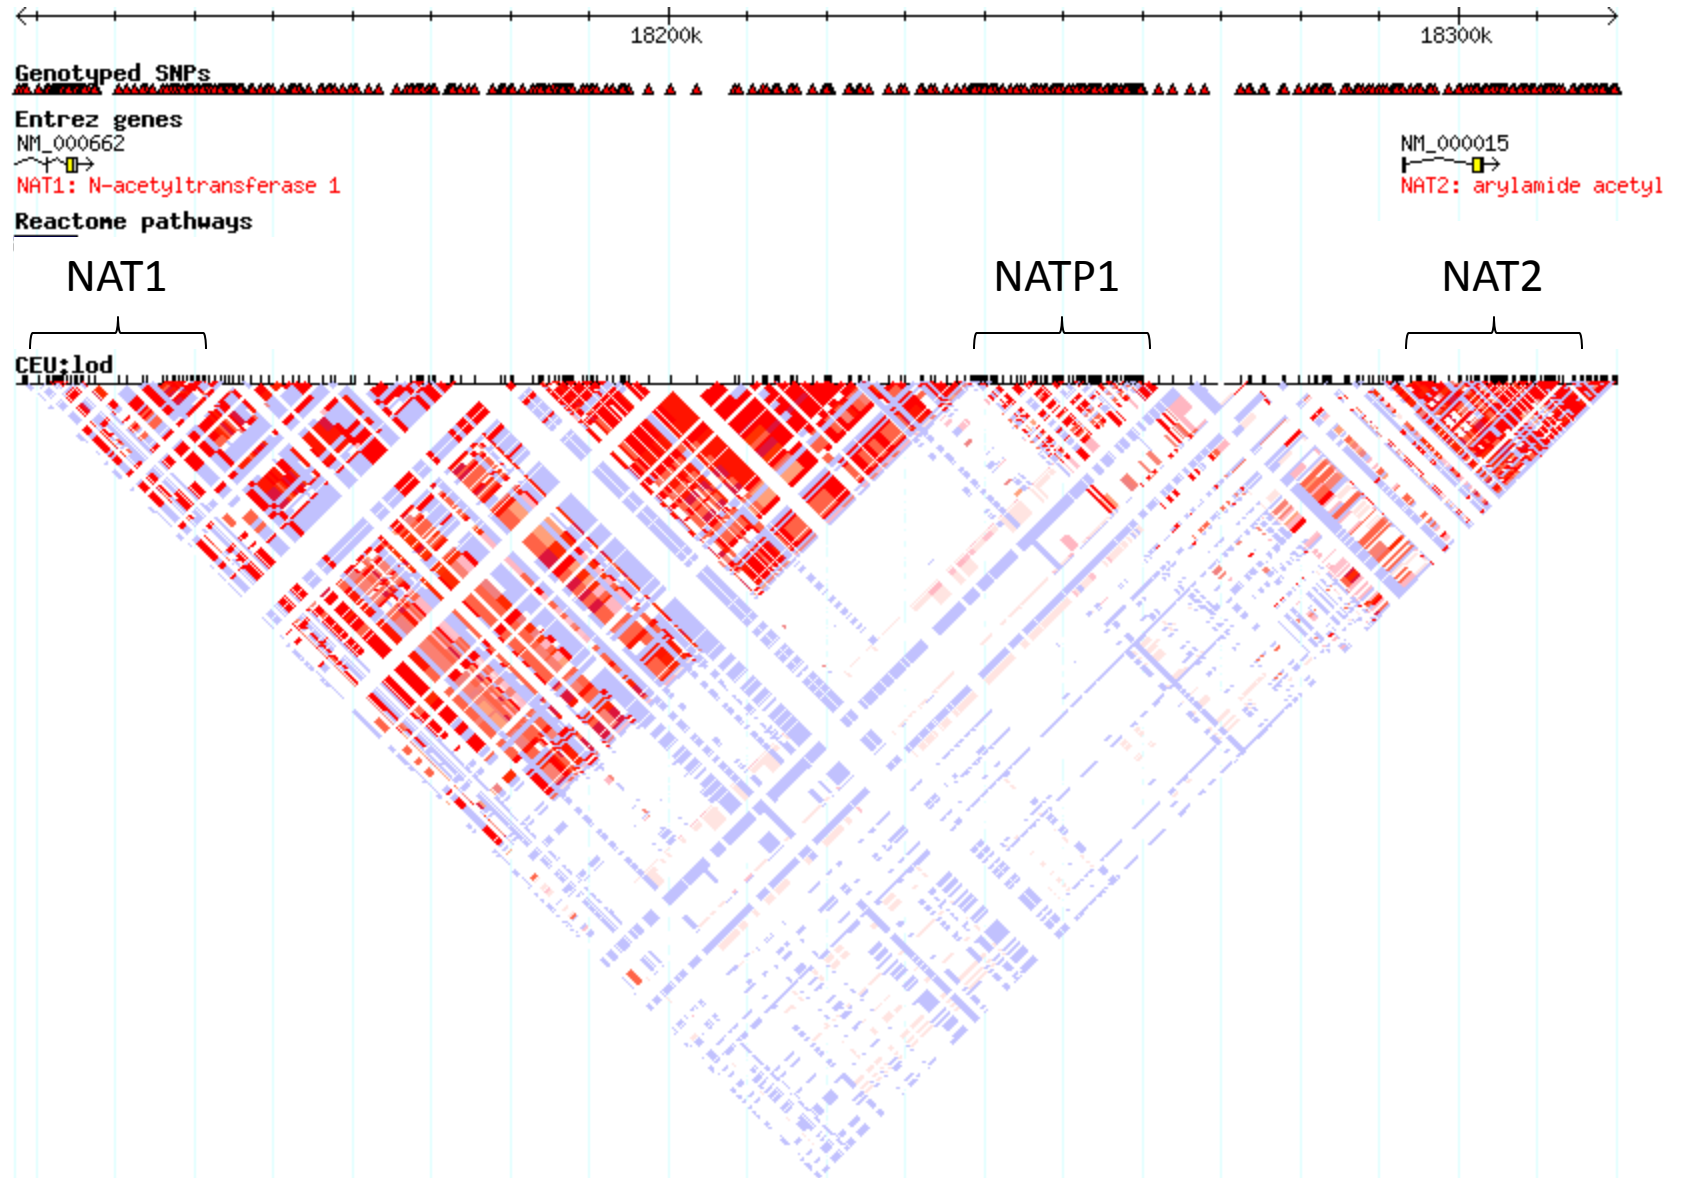

Supplement: NIHMS517703-supplement-Supplementary_4.pdf [file NIHMS517703-supplement-Supplementary_4.pdf]

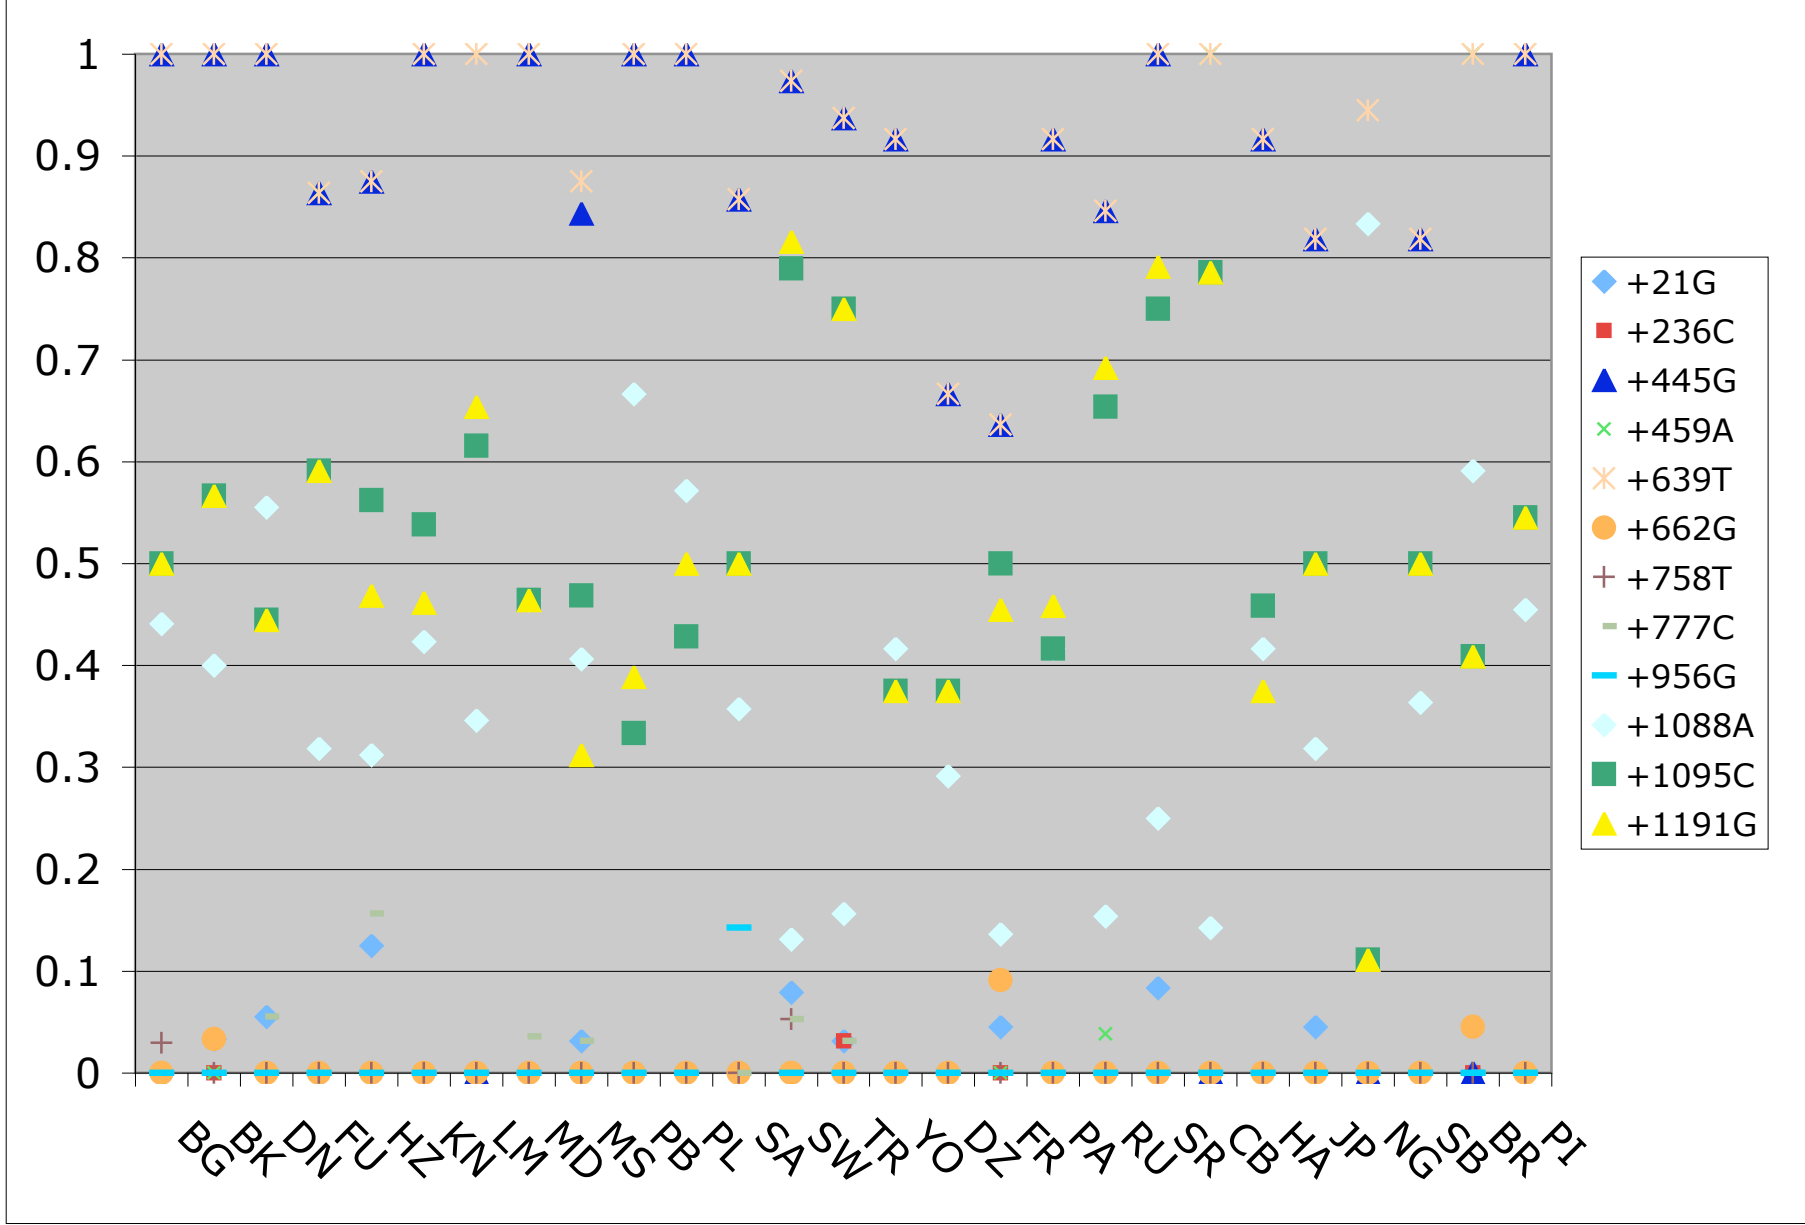

Supplement: NIHMS517703-supplement-Supplementary_5.pdf [file NIHMS517703-supplement-Supplementary_5.pdf]
